# Supplementary material for: Water electrolysis: from textbook knowledge to the latest scientific strategies and industrial developments
Source: PubMed Central journal article supplement (PMC9332215; doi:10.1039/d0cs01079k), 2022-05-16
Supplement: CS-051-D0CS01079K-s001.pdf [file CS-051-D0CS01079K-s001.pdf]

# ***Supplemental Information for: Water Electrolysis: From textbook knowledge to the latest scientific strategies and industrial developments***

Marian Chatenet<sup>a</sup>, Bruno G. Pollet<sup>b, c</sup>, Dario R. Dekel<sup>d, e</sup>, Fabio Dionigi<sup>f</sup>, Jonathan Deseure<sup>a</sup>, Pierre Millet<sup>g</sup>,

Richard D. Braatz<sup>h</sup>, Martin Z. Bazant<sup>h, i</sup>, Michael Eikerling<sup>j, k</sup>, Iain Staffell<sup>l</sup>,

Paul Balcombe<sup>m</sup>, Yang Shao-Horn<sup>n</sup>, and Helmut Schäfer<sup>o\*</sup>

## **Address:**

a: University Grenoble Alpes, CNRS, Grenoble-INP (Institute of Engineering, Univ. Grenoble Alpes), LEPMI 38000 Grenoble, France. [Orcid.org/0000-0002-9673-4775](https://orcid.org/0000-0002-9673-4775) (Marian Chatenet). [Orcid.org/0000-0002-2055-7653](https://orcid.org/0000-0002-2055-7653) (Jonathan Deseure).

b: Hydrogen Energy and Sonochemistry Research group, Department of Energy and Process Engineering, Faculty of Engineering, Norwegian University of Science and Technology (NTNU) NO-7491, Trondheim, Norway. [Orcid.org/0000-0002-4928-7378](https://orcid.org/0000-0002-4928-7378) (Bruno G. Pollet).

c: Green Hydrogen Lab, Hydrogen Research Institute (HRI), Université Du Québec à Trois-Rivières (UQTR), 3351 Boulevard des Forges, Trois-Rivières, Québec G9A 5H7, Canada.

d: The Wolfson Department of Chemical Engineering, Technion – Israel Institute of Technology, Haifa, 3200003, Israel. [Orcid.org/0000-0002-8610-0808](https://orcid.org/0000-0002-8610-0808) (Dario Dekel).

e: The Nancy & Stephen Grand Technion Energy Program (GTEP), Technion - Israel Institute of Technology, Haifa 3200003, Israel

f: Department of Chemistry, Chemical Engineering Division, Technical University Berlin, 10623, Berlin, Germany. [Orcid.org/0000-0002-0576-024X](https://orcid.org/0000-0002-0576-024X) (Fabio Dionigi)

g: Institut de Chimie Moléculaire et des Matériaux d'Orsay (UMR 8182), University of Paris-Saclay, rue du Doyen Georges Poitou, bâtiment 410, 91400, Orsay, France. [Orcid.org/0000-0002-0224-9868](https://orcid.org/0000-0002-0224-9868) (Pierre Millet).

h: Department of Chemical Engineering, Massachusetts Institute of Technology, Cambridge, Massachusetts 02139, United States. [Orcid.org/0000-0003-4304-3484](https://orcid.org/0000-0003-4304-3484) (Richard D. Braatz). [Orcid.org/0000-0002-8200-4501](https://orcid.org/0000-0002-8200-4501) (Martin Z. Bazant).

i: Department of Mathematics, Massachusetts Institute of Technology, 77 Massachusetts Avenue, Cambridge, Massachusetts 02139, United States.

j: Chair of Theory and Computation of Energy Materials, Division of Materials Science and Engineering, RWTH Aachen University, Intzestraße 5, 52072 Aachen, Germany [Orcid.org/0000-0002-0764-8948](https://orcid.org/0000-0002-0764-8948) (Michael Eikerling).

k: Institute of Energy and Climate Research, IEK-13: Modelling and Simulation of Materials in Energy Technology, Forschungszentrum Jülich GmbH, 52425 Jülich, Germany.

l: Centre for Environmental Policy, Imperial College London, London, UK. [Orcid.org/0000-0003-1012-7075](https://orcid.org/0000-0003-1012-7075) (Iain Staffell).

m: Division of Chemical Engineering and Renewable Energy, School of Engineering and Material Science, Queen Mary University of London, London, UK. [Orcid.org/0000-0002-3490-0707](https://orcid.org/0000-0002-3490-0707) (Paul Balcombe).

n: Research Laboratory of Electronics and Department of Mechanical Engineering, Massachusetts Institute of Technology, Cambridge, Massachusetts 02139, United States. [Orcid.org/0000-0001-8714-2121](https://orcid.org/0000-0001-8714-2121) (Yang Shao-Horn).

o: Institute of Chemistry of New Materials, The Electrochemical Energy and Catalysis Group, University of Osnabrück, Barbarastrasse 7, 49076 Osnabrück, Germany. [Orcid.org/0000-0001-5906-3354](https://orcid.org/0000-0001-5906-3354) (Helmut Schäfer).

**Email:** [helmut.schaefer@uos.de](mailto:helmut.schaefer@uos.de)

**Table S1.** Chemical and mechanical properties of selected AEMs.

| Membrane                              | Polymeric backbone                                      | Functional group                                  | Properties       |                      |                    |                    |                |                        |                   |                       | Conductivity measurement temp. (°C) | Applied in EW | Refs.    |
|---------------------------------------|---------------------------------------------------------|---------------------------------------------------|------------------|----------------------|--------------------|--------------------|----------------|------------------------|-------------------|-----------------------|-------------------------------------|---------------|----------|
|                                       |                                                         |                                                   | IEC <sup>a</sup> | Conductivity (mS/cm) | Water uptake (wt%) | Swelling ratio (%) | Thickness (µm) | Tensile strength (Mpa) | Elongation (%)    | Young's modulus (MPa) |                                     |               |          |
| PTP-75                                | [(terphenyl piperidinium)-co-(oxindole terphenylylene)] | Piperidinium                                      | 2.10             | 48.6                 | 31.4               | 4.9 <sup>b</sup>   | 45             | 29.2                   | 6.8               | 466.7                 | 20                                  | +             | 1        |
| PTP-85                                | [(terphenyl piperidinium)-co-(oxindole terphenylylene)] | Piperidinium                                      | 2.38             | 59.6                 | 37.0               | 5.9 <sup>b</sup>   | 45             | 34.2                   | 24.2              | 620.2                 | 20                                  | +             | 1        |
| PTP-90                                | [(terphenyl piperidinium)-co-(oxindole terphenylylene)] | Piperidinium                                      | 2.52             | 64.4                 | 39.7               | 7.4                | 45             | 36.5                   | 25.2              | 777.6                 | 20                                  | +             | 1        |
| FAA3-30 (OH-) (FumaTech) <sup>b</sup> | N/A                                                     | N/A                                               | 1.7-2.1          | 40                   | N/A                | N/A                | 25-35          | 25-40                  | 20-40             | N/A                   | N/A                                 | -             | 2        |
| FAA3-50 (OH-) (FumaTech) <sup>b</sup> | N/A                                                     | N/A                                               | 1.59, 1.85       | 40                   | 17                 | 9                  | 47-53          | 25-40                  | 20-40             | N/A                   | N/A                                 | +             | 2, 3     |
| QMSV-0.16                             | poly(ST-co-VBC                                          | TMA                                               | 1.04             | 0.264                | 16.7               | 10.9               | 60             | N/A                    | N/A               | N/A                   | 25                                  | +             | 4        |
| QMSV-0.33                             | poly(ST-co-VBC                                          | TMA                                               | 2.14             | 6.80                 | 127.4              | 15.9               | 60             | N/A                    | N/A               | N/A                   | 25                                  | +             | 4        |
| PFOTFPh-TMA-C6                        | (fluorene-alt-tetrafluorophenylene                      | trimethylammonium (TMA)                           | 3.2              | 156                  | 122                | 97                 | 20-30          | 26.8                   | 8                 | N/A                   | 70                                  | +             | 5, 6     |
| PFOTFPh-TMA-C8                        | (fluorene-alt-tetrafluorophenylene                      | trimethylammonium (TMA)                           | 2.9              | 117                  | 74 <sup>d</sup>    | 39                 | 20-30          | 28.5                   | 8                 | N/A                   | 70                                  | +             | 5, 6     |
| PFOTFPh-TMA-C10                       | (fluorene-alt-tetrafluorophenylene                      | trimethylammonium (TMA)                           | 2.7              | 101                  | 67 <sup>d</sup>    | 33                 | 20-30          | 40.9                   | 10                | N/A                   | 70                                  | +             | 5, 6     |
| GT69 <sup>c</sup>                     | poly (norbornene) (PNB)                                 | N,N,N',N'- tetramethyl-1,6-hexanediamine (TMHDA), | 3.38             | 178                  | 115                | N/A                | N/A            | N/A                    | N/A               | N/A                   | 80                                  | +             | 7        |
| GT72-5 <sup>c</sup>                   | poly (norbornene) (PNB)                                 | N,N,N',N'- tetramethyl-1,6-hexanediamine (TMHDA), | 3.50             | 175                  | 96                 | N/A                | N/A            | N/A                    | N/A               | N/A                   | 80                                  | +             | 7        |
| GT74 <sup>c</sup>                     | poly (norbornene) (PNB)                                 | N,N,N',N'- tetramethyl-1,6-hexanediamine (TMHDA), | 3.56             | 160                  | 103                | N/A                | 35<br>50       | N/A                    | N/A               | N/A                   | 80                                  | +             | 7        |
| PAP-TP-85                             | poly(aryl piperidinium) hydroxide                       | piperidinium                                      | 2.37             | 193                  | 65                 | 12                 | 10-25          | 67                     | 117               | N/A                   | 95                                  | +             | 8, 9, 10 |
| PAP-TP-85-MQN                         | poly(aryl piperidinium) hydroxide                       | piperidinium                                      | 3.2              | 150 <sup>d</sup>     | N/A                | N/A                | 20             | N/A                    | N/A               | N/A                   | RT                                  | +             | 8        |
| PBI1-PVBC1-NMPD/OH                    | poly(vinylbenzyl chloride) (PVBC) cross-linked by       | N-methylpiperidine                                | 2.31             | 83                   | 48                 | 11                 | 50             | 37.5 <sup>e</sup>      | 16.2 <sup>e</sup> | N/A                   | 80                                  | +             | 11       |

| Membrane                                  | Polymeric backbone                                                                | Functional group                        | Properties       |                      |                    |                    |                 |                        |                     |                       | Conductivity measurement temp. (°C) | Applied in EW | Refs.                                 |
|-------------------------------------------|-----------------------------------------------------------------------------------|-----------------------------------------|------------------|----------------------|--------------------|--------------------|-----------------|------------------------|---------------------|-----------------------|-------------------------------------|---------------|---------------------------------------|
|                                           |                                                                                   |                                         | IEC <sup>a</sup> | Conductivity (mS/cm) | Water uptake (wt%) | Swelling ratio (%) | Thickness (µm)  | Tensile strength (Mpa) | Elongation (%)      | Young's modulus (MPa) |                                     |               |                                       |
|                                           | polybenzimidazole (PBI) and quaternized by N-methylpiperidine (NMPD) <sup>i</sup> |                                         |                  |                      |                    |                    |                 |                        |                     |                       |                                     |               |                                       |
| PAni-0.87                                 | Polyaniline                                                                       | 3,30 - iminobis(N,Ndimethylpropylamine) | 0.87             | 54.9                 | 13.8               | 10.3               |                 | N/A                    | N/A                 | N/A                   | 80                                  | -             | 12                                    |
| PAni-0.92                                 | Polyaniline                                                                       | 3,30 - iminobis(N,Ndimethylpropylamine) | 0.92             | 90.1                 | 18.1               | 11.7               |                 | N/A                    | N/A                 | N/A                   | 80                                  | -             | 12                                    |
| PAni-1.03                                 | Polyaniline                                                                       | 3,30 - iminobis(N,Ndimethylpropylamine) | 1.03             | 105                  | 22.3               | 18.7               | N/A             | N/A                    | N/A                 | N/A                   | 80                                  | +             | 12                                    |
| IPA <sup>b</sup>                          | N/A                                                                               | N/A                                     | 1.27             | 32.4                 | 23.1               | 15.6               | N/A             | N/A                    | N/A                 | N/A                   | 80                                  | +             | 12                                    |
| AMB <sup>b</sup>                          | N/A                                                                               | N/A                                     | 1.06             | 3.3                  | 24.3               | N/A                | N/A             | N/A                    | N/A                 | N/A                   | 80                                  | +             | 12                                    |
| Tokuyama- A201 <sup>b</sup>               | N/A                                                                               | N/A                                     | 1.8              | 42                   | 30                 | N/A                | 28 <sup>c</sup> | 96.4 <sup>g</sup>      | 61.7 <sup>g</sup>   | 1123 <sup>g</sup>     | (26,41)                             | +             | 2, 10, 13, 14                         |
| AEMION™-AF1-HNN8-50-X <sup>b</sup>        | N/A                                                                               | N/A                                     | 2.1-2.5          | 102                  | N/A                | N/A                | 50              | 60 (dry I)             | 85-110 <sup>j</sup> | N/A                   | 50                                  | +             | 2, 15                                 |
| AEMION™-AF1-HNN8-25-X <sup>b</sup>        | N/A                                                                               | N/A                                     | 2.1-2.5          | 131                  | N/A                | N/A                | 25              | 60 (dry I)             | 85-110 <sup>g</sup> | N/A                   | 50                                  | +             | 2, 15                                 |
| AEMION™-AF1-HNN5-50-X <sup>b</sup>        | N/A                                                                               | N/A                                     | 1.4-1.7          | 40                   | N/A                | N/A                | 50              | 60 (dry I)             | 85-110 <sup>g</sup> | N/A                   | 50                                  | +             | 2                                     |
| AF1-HNN5-25-X <sup>b</sup>                | N/A                                                                               | N/A                                     | 1.4-1.7          | 56                   | N/A                | N/A                | 25              | 60 (dry I)             | 85 <sup>g</sup>     | N/A                   | 50                                  | +             | 2, 15                                 |
| SUSTAINION® Sustainion 37-50 <sup>b</sup> | Copolymer of styrene and vinyl benzyl chloride                                    | Tetramethyl Imidazole                   | N/A              | 80 <sup>f</sup>      | N/A                | cracks when dry    | 50              | cracks when dry        | cracks when dry     | N/A                   | 30                                  | +             | 2, 19, 16, 17, 18, 19, 20, 21, 22, 23 |
| HDPE-AEM                                  | High density polyethylene                                                         | TMA                                     | 2.44             | 214 <sup>g,i</sup>   | 155 <sup>g</sup>   | 38                 | 29              | 35                     | 283                 | N/A                   | 80                                  | -             | 24, 25                                |
| LDPE-AEM                                  | Low density polyethylene                                                          | TMA                                     | 2.54             | 290<br>201<br>304    | 149                | 27                 | 28              | 23                     | 69                  | N/A                   | 110<br>105<br>120                   | -             | 25, 24, 26, 27, 28, 29                |
| C4-AEM                                    | ETFE                                                                              | pyrrolidinium                           | 1.51             | 30                   | 85                 | 59                 | N/A             | N/A                    | N/A                 | N/A                   | 60                                  | -             | 25, 30                                |
| SEBS-BTMA                                 | polystyrene-b-poly(ethylene-co-butylene)-b-polystyrene (SEBS)                     | TMA                                     | 1.04             | 32                   | 40                 | 25.1               | 60              | 2.0                    | 180.1               | N/A                   | 80                                  | -             | 25, 31                                |

| Membrane                                 | Polymeric backbone                                                                                                                     | Functional group                                                        | Properties       |                      |                    |                    |                |                        |                |                       | Conductivity measurement temp. (°C) | Applied in EW | Refs.      |
|------------------------------------------|----------------------------------------------------------------------------------------------------------------------------------------|-------------------------------------------------------------------------|------------------|----------------------|--------------------|--------------------|----------------|------------------------|----------------|-----------------------|-------------------------------------|---------------|------------|
|                                          |                                                                                                                                        |                                                                         | IEC <sup>a</sup> | Conductivity (mS/cm) | Water uptake (wt%) | Swelling ratio (%) | Thickness (µm) | Tensile strength (Mpa) | Elongation (%) | Young's modulus (MPa) |                                     |               |            |
| SEBS-CH2-QA-1.5                          | SEBS                                                                                                                                   | Long flexible alkyl spacer                                              | 1.35             | 56                   | 48                 | 29.6               | 60             | 3.3                    | 345.7          | N/A                   | 80                                  | -             | 25, 31     |
| XL100-SEBS-C5-TMA-0.8                    | SEBS                                                                                                                                   | TMA with different degree of functionalization and cation tether length | 1.50             | 65                   | 28                 | 10                 | 60             | 7.0                    | 400            | N/A                   | 80                                  | -             | 25, 32     |
| 1:1 DCPD:1                               | a tetraalkylammonium-functionalized norbornene with dicyclopentadiene (DCPD)                                                           | tetraalkylammonium                                                      | 1.40             | 28                   | N/A                | N/A                | N/A            | 2.3                    | 26             | N/A                   | 50                                  | -             | 25, 33     |
| P1.25-OH                                 | poly(norbornene)                                                                                                                       | pendant trimethylammonium cations                                       | 1.25             | 177                  | 82                 | N/A                | N/A            | N/A                    | N/A            | N/A                   | 80                                  |               | 25, 34     |
| XL35-rPNB-X60-Y40                        | Poly(bromopropyl norbornene)-blockpoly(butyl norbornene) diblock copolymers                                                            | TMHDA                                                                   | 2.20             | 109                  | 100                | 28                 | N/A            | 2.5                    | 52             | N/A                   | 80                                  | -             | 25, 35     |
| HC-[1] <sub>498</sub> [2] <sub>200</sub> | PE                                                                                                                                     | Imidazolium                                                             | 1.69             | 134                  | 115                | 17                 | N/A            | N/A                    | N/A            | N/A                   | 80                                  | -             | 25, 36     |
| PNB-X62-Y38                              | The tetrablock copolymer, consisting of alternating butyl norbornene (BuNB) and bromopropyl norbornene (BPNB) blocks (two blocks each) | norbornene                                                              | 2.21             | 102                  | 71                 | N/A                | 50             | N/A                    | N/A            | N/A                   | 80                                  | -             | 25, 37     |
| H22C9N                                   | poly(olefin)s                                                                                                                          | trimethylamine with the alkyl group                                     | 1.43             | 70 <sup>1</sup>      | 177                | 40                 | N/A            | N/A                    | N/A            | N/A                   | 80                                  | -             | 25, 38     |
| F20C9N                                   | poly(olefin)s                                                                                                                          | trimethylamine with the alkyl group                                     | 1.21             | 91 <sup>1</sup>      | 109                | 26                 | 70             | N/A                    | N/A            | N/A                   | 80                                  | -             | 25, 38     |
| ATMPP                                    | poly(phenylene)s                                                                                                                       | benzylic cations                                                        | 2.39             | 18                   | 156                | N/A                | N/A            | N/A                    | N/A            | N/A                   | 22                                  | -             | 25, 39     |
| HTMA-DAPP                                | polyphenylene                                                                                                                          | hexamethyl trimethyl ammonium                                           | 2.6              | 120                  | 58                 | N/A                | 26             | >20                    | N/A            | N/A                   | 80                                  | +             | 25, 40     |
| QPAF (C6)-2                              | perfluoroalkylene and phenylene groups                                                                                                 | TMA                                                                     | 1.14             | 96                   | 45                 | N/A                | 50             | 24                     | 218            | N/A                   | 80                                  | -             | 25, 41     |
| QP-QAF3                                  | quinquephenylene and fluorene groups                                                                                                   | pendant hexyltrimethylammonium                                          | 2.21             | 134                  | 85                 | N/A                | 22             | 35                     | 28             | 6                     | 80                                  | -             | 25, 42     |
| PAImEE (12)                              | poly(arylimidazoliums)                                                                                                                 | Ethyl as alkyl chains                                                   | 2.65             | 46 <sup>g</sup>      | 28 <sup>j</sup>    | 26.1               | 25             | 64                     | 28.7           | 1075                  | 80                                  | +             | 25, 43     |
| BPN1                                     | biphenyl                                                                                                                               | trifluoromethyl                                                         | 2.61             | 122                  | 130                | 40                 | 25             | 35                     | 140            | N/A                   | 80                                  | -             | 25, 44, 45 |
| <i>p</i> -TPN1                           | Para- terphenyl                                                                                                                        | trifluoromethyl                                                         | 2.15             | 81                   | 43                 | 6                  | 25             | 24                     | 20             | N/A                   | 80                                  | -             | 25, 44, 45 |
| <i>m</i> -TPN1                           | meta-terphenyl                                                                                                                         | trifluoromethyl                                                         | 2.15             | 127                  | 45                 | 10                 | 25             | 30                     | 38             | N/A                   | 80                                  | -             | 25, 44, 45 |
| FLN-55                                   | Quaternized poly(fluorene)s                                                                                                            | TMA                                                                     | 2.50             | 120                  | 180                | 60                 | 30             | N/A                    | N/A            | N/A                   | 80                                  | -             | 25         |

| Membrane                               | Polymeric backbone                                                                                                                                 | Functional group                                            | Properties       |                      |                    |                    |                |                        |                |                       | Conductivity measurement temp. (°C) | Applied in EW | Refs.      |
|----------------------------------------|----------------------------------------------------------------------------------------------------------------------------------------------------|-------------------------------------------------------------|------------------|----------------------|--------------------|--------------------|----------------|------------------------|----------------|-----------------------|-------------------------------------|---------------|------------|
|                                        |                                                                                                                                                    |                                                             | IEC <sup>a</sup> | Conductivity (mS/cm) | Water uptake (wt%) | Swelling ratio (%) | Thickness (µm) | Tensile strength (Mpa) | Elongation (%) | Young's modulus (MPa) |                                     |               |            |
| PTPipQ6                                | poly(arylene)                                                                                                                                      | piperidinium                                                | 2.04             | 111                  | 44                 | N/A                | 60             | N/A                    | N/A            | N/A                   | 80                                  | -             | 25, 46     |
| PTPipQ1                                | poly(arylene)                                                                                                                                      | piperidinium                                                | 2.38             | 89                   | 145                | N/A                | 60             | N/A                    | N/A            | N/A                   | 80                                  | -             | 46         |
| PVBC-MPy/15%PEK-cardo                  | poly(vinyl benzyl chloride) (PVBC-MPy) and poly(ether ketone-cardo)                                                                                | methylpyrrolidinium                                         | 3.47             | 50.3                 | 132                | 110                | 60             | 4.5                    | 31.3           | 20.7                  | 80                                  | -             | 47         |
| PVBC-MPy/25%PEK-cardo                  | (PVBC-MPy) and poly(ether ketone-cardo)                                                                                                            | methylpyrrolidinium                                         | 3.10             | 37.7                 | 59                 | 61                 | 60             | 9.5                    | 33.3           | 30.9                  | 80                                  | -             | 47         |
| PVBC-MPy/35%PEK-cardo                  | (PVBC-MPy) and poly(ether ketone-cardo)                                                                                                            | methylpyrrolidinium                                         | 2.65             | 28.5                 | 32                 | 38                 | 60             | 15.1                   | 23.9           | 67.6                  | 80                                  | +             | 47         |
| PVBC-MPy/45%PEK-cardo                  | (PVBC-MPy) and poly(ether ketone-cardo)                                                                                                            | methylpyrrolidinium                                         | 2.34             | 15.4                 | 24                 | 26                 | 60             | 22.1                   | 19.3           | 110                   | 80                                  | -             | 47         |
| PSF-TMA <sup>+</sup>                   | polysulfone (PSF)                                                                                                                                  | trimethylammonium                                           | 2.05             | 30.5                 | N/A                | N/A                | 40-80          | N/A                    | N/A            | N/A                   | 50                                  | +             | 48, 49     |
| PSF-DMP <sup>+</sup>                   | polysulfone (PSF)                                                                                                                                  | 1,4-dimethylpiperazinium                                    | 1.51             | 14.4                 | 230                | N/A                | 40-80          | N/A                    | N/A            | N/A                   | 50                                  | -             | 49         |
| xQAPS                                  | PSF                                                                                                                                                | Trimethylammonium Dimethyl diethyl ammonium as cross linker | 1.34             | 60.5                 | N/A                | 4                  | N/A            | N/A                    | N/A            | N/A                   | 80                                  | +             | 50, 51, 52 |
| PPO24-BIM (bromide form)               | oly-(2,6-dimethyl-1,4-phenylene oxide)                                                                                                             | mesityl-benzimidazole (BIM)                                 | 1.9              | 12                   | 27                 | N/A                | 23             | 45.9                   | 6.0            | 951                   | 60                                  | +             | 13         |
| FAA3-PK-75 (bromide form) <sup>b</sup> | N/A                                                                                                                                                | N/A                                                         | N/A              | N/A                  | N/A                | N/A                | 87             | 26.9                   | 12.1           | 983                   | 60                                  | +             | 13, 53     |
| PSEBS-CM-DABCO                         | polystyrene-block-poly(ethylene-ran-butylene)-block-polystyrene (PSEBS)                                                                            | 1,4-diazabicyclo[2.2.2]octane (DABCO)                       | 0.76             | 75                   | N/A                | N/A                | 100            | N/A                    | N/A            | N/A                   | 30                                  | +             | 54         |
| PAEK-APMP75                            | Poly (arylene ether) ketone                                                                                                                        | 1-(3-aminopropyl)-4-methylpiperazin                         | 1.10             | 6.82                 | 38                 | N/A                | 55             | 12.6                   | 30.4           | N/A                   | 60                                  | +             | 55         |
| PAEK-APMP100                           | Poly (arylene ether) ketone                                                                                                                        | 1-(3-aminopropyl)-4-methylpiperazin                         | 1.32             | 9.94                 | 48                 | N/A                | 55             | 9.7                    | 41             | N/A                   | 60                                  | +             | 55         |
| QPDTB                                  | three monomers of methacrylate:2-dimethylaminoethyl methacrylate (DMAEMA), 2,2,2-trifluoroethyl methacrylate (TFEMA), and butyl methacrylate (BMA) | Trimethyl amine                                             | 1.275            | 59                   | N/A                | N/A                | 300            | 7.629                  | 45.8           | 226                   | 50                                  | +             | 56, 57     |

| Membrane                    | Polymeric backbone                                                                                       | Functional group                                                                                | Properties       |                      |                    |                    |                |                        |                |                       | Conductivity measurement temp. (°C) | Applied in EW | Refs.  |
|-----------------------------|----------------------------------------------------------------------------------------------------------|-------------------------------------------------------------------------------------------------|------------------|----------------------|--------------------|--------------------|----------------|------------------------|----------------|-----------------------|-------------------------------------|---------------|--------|
|                             |                                                                                                          |                                                                                                 | IEC <sup>a</sup> | Conductivity (mS/cm) | Water uptake (wt%) | Swelling ratio (%) | Thickness (µm) | Tensile strength (Mpa) | Elongation (%) | Young's modulus (MPa) |                                     |               |        |
| LDPE-g-VBC-Dab              | Low density polyethylene (LDPE) grafted vinylbenzyl chloride (VBC)                                       | ,4-diazabicyclo(2.2.2)octane (Dabco)                                                            | 1.5              | 25                   | 81                 | N/A                | N/A            | N/A                    | N/A            | N/A                   | 60                                  | +             | 58     |
| SEBS-Pi-73%                 | Polystyrene-block-poly(ethylene-ran-butylene)-block-polystyrene                                          | N-Methylpyridine                                                                                | 1.19             | 10.09                | 59.13              | 25.03              | N/A            | 4.2                    | 600            | N/A                   | 30                                  | +             | 59     |
| PBP-ASU-PPO                 | poly(biphenyl piperidinium) (PBP)/6-azaspiro[5.5]undecane (ASU)-functionalized polyphenyl ether (ASU-PP) | Piperidinium and ASU                                                                            | 2.61             | 128                  | 120                | 21                 | 50             | N/A                    | N/A            | N/A                   | 80                                  | +             | 60     |
| Tokuyama- A901 <sub>b</sub> | N/A                                                                                                      | N/A                                                                                             | 1.8              | N/A                  | N/A                | N/A                | 9              | N/A                    | N/A            | N/A                   | N/A                                 | +             | 61     |
| FAA-3-PP-75                 | N/A                                                                                                      | N/A                                                                                             | N/A              | 38                   | 140                | 13-15              | 80             | N/A                    | N/A            | N/A                   | 60                                  | +             | 62     |
| SEBS                        | polystyrene-b-poly(ethylene/butylene)-b-polystyrene                                                      | Trimethyl amine                                                                                 | 1.9              | 140                  | N/A                | N/A                | 120            | N/A                    | N/A            | N/A                   | 50                                  | +             | 63     |
| PTFE+qPDTB-OH               | Polytetrafluoroethylene (PTFE)                                                                           | Quaternary ammonium Poly(DMAEMA-co-TFEMA-co-BMA)<br><br>(quaternary ammonium polymethacrylate)  | 1.02             | 34                   | N/A                | 146                | 30             | 10                     | 10             | 406                   | 50                                  | +             | 64     |
| mm-qPVBz/OH                 | Methylated melamine grafted poly vinyl benzylchloride (mm-qPVBz/Cl)                                      | Amination with methylated melamine                                                              | N/A              | 27                   | N/A                | N/A                | 70             | 12.1                   | 14             | 142                   | 60                                  | +             | 65, 66 |
| BNP1-100                    | poly(arylene)                                                                                            | N,N,N-trimethylpentan-1-ammonium                                                                | 2.61             | 122                  | 124                | 66                 | N/A            | N/A                    | N/A            | N/A                   | 80                                  | +             | 67     |
| TPN1-100                    | poly(arylene)                                                                                            | N,N,N-trimethylpentan-1-ammonium                                                                | 2.15             | 112                  | 70                 | 23                 | N/A            | N/A                    | N/A            | N/A                   | 80                                  | +             | 67     |
| PAImEE(12)                  | poly(aryl)                                                                                               | Imidazolium                                                                                     | 2.65             | 21.3                 | 28.1               | 26.1               | 25             | 64.0                   | 28.7           | 1075                  | 22                                  | +             | 43     |
| PAImBB(14)                  | poly(aryl)                                                                                               | Imidazolium                                                                                     | 2.3              | 8.5                  | 12.2               | 14.0               | 20             | 65.2                   | 20.4           | 1095                  | 22                                  | +             | 43     |
| QPC-TMA                     | poly(carbazole)                                                                                          | polymer (poly(9-(6-(trimethylammonium bromide)hexyl)-9H-carbazole-co-1,1,1-trifluoroisopropane) | 2.08<br>2.00     | 125                  | 76                 | 15                 | 50             | N/A                    | N/A            | N/A                   | 70                                  | +             | 68     |
| PVBC-MPy M2                 | poly(vinyl benzyl)                                                                                       | methylpyrrolidinium                                                                             | 2.02             | 32.8                 | 28.5               | 23.8               | 80             | 9.4                    | 16.5           | N/A                   | 80                                  | +             | 69     |
| PVBC-MPy M4                 | poly(vinyl benzyl)                                                                                       | methylpyrrolidinium                                                                             | 2.01             | 29.8                 | 19.8               | 20.4               | 80             | 30.9                   | 11.1           | N/A                   | 80                                  | +             | 69     |

| Membrane             | Polymeric backbone                                                                 | Functional group                               | Properties       |                      |                    |                    |                |                        |                |                       | Conductivity measurement temp. (°C) | Applied in EW | Refs.  |
|----------------------|------------------------------------------------------------------------------------|------------------------------------------------|------------------|----------------------|--------------------|--------------------|----------------|------------------------|----------------|-----------------------|-------------------------------------|---------------|--------|
|                      |                                                                                    |                                                | IEC <sup>a</sup> | Conductivity (mS/cm) | Water uptake (wt%) | Swelling ratio (%) | Thickness (µm) | Tensile strength (Mpa) | Elongation (%) | Young's modulus (MPa) |                                     |               |        |
| PVBC-MPy M6          | poly(vinyl benzyl)                                                                 | methylpyrrolidinium                            | 1.97             | 30.5                 | 21.5               | 17.0               | 80             | 20.6                   | 8.9            | N/A                   | 80                                  | +             | 69     |
| MES-PBI (25 wt% KOH) | polybenzimidazole                                                                  | poly(2,2'-(m-mesitylene)-5,5'-bibenzimidazole) | N/A              | 100                  | N/A                | 54                 | 60             | N/A                    | N/A            | N/A                   | 80                                  | +             | 70     |
| PPO-TMA              | polyphenylene oxide (PPO)                                                          | trimethylamine (TMA)                           | 2.1              | 52                   | 104                | N/A                | N/A            | 6.3                    | 1.9            | N/A                   | 70                                  | +             | 71, 72 |
| PPO-ABCO             | polyphenylene oxide (PPO)                                                          | 1-Azabicyclo[2.2.2]octane (ABCO)               | 1.9              | 39                   | 147                | N/A                | N/A            | 10.3                   | 2              | N/A                   | 70                                  | +             | 71, 72 |
| PISPVA46             | poly(1-vinyl-3-imidazole-co-styrene) (PIS) co-poly(vinyl alcohol) (PVA)            | imidazolium                                    | 1.65             | 90                   | 101.1              | 18.6               | 55             | 15.5                   | 316.5          | N/A                   | 60                                  | +             | 73     |
| PISPVA37             | poly(1-vinyl-3-imidazole-co-styrene) (PIS) co-poly(vinyl alcohol) (PVA)            | imidazolium                                    | 1.41             | 82                   | 78.9               | 19.7               | 55             | 27.6                   | 295.1          | N/A                   | 60                                  | +             | 73     |
| PISPVA28             | poly(1-vinyl-3-imidazole-co-styrene) (PIS) co-poly(vinyl alcohol) (PVA)            | imidazolium                                    | 1.13             | 74                   | 49.7               | 18.7               | 55             | 30.8                   | 216.9          | N/A                   | 60                                  | +             | 73     |
| QMter-co-Mpi-60%     | ether-free polyarylene                                                             | piperidinium                                   | 1.65             | 8                    | 37.15              | 11.89              | N/A            | N/A                    | N/A            | N/A                   | 30                                  | -             | 74     |
| QMter-co-Mpi-80%     | ether-free polyarylene                                                             | piperidinium                                   | 2.10             | 21                   | 49.39              | 17.77              | N/A            | N/A                    | N/A            | N/A                   | 30                                  | -             | 74     |
| QMter-co-Mpi-100%    | ether-free polyarylene                                                             | piperidinium                                   | 2.42             | 37                   | 78.92              | 29.00              | N/A            | 11                     | 24             | N/A                   | 30                                  | +             | 74     |
| BPi                  | PPO                                                                                | piperidinium                                   | 1.94             | 18                   | 29.0               | 9.5                | 50             | 32.7                   | 2.7            | N/A                   | 20                                  | -             | 75     |
| SCPi                 | PPO                                                                                | piperidinium                                   | 1.67             | 25                   | 41.7               | 11                 | 50             | 48.4                   | 3.5            | N/A                   | 20                                  | +             | 75     |
| LSCPi                | PPO                                                                                | piperidinium                                   | 1.57             | 29                   | 39.6               | 10.3               | 50             | 35.6                   | 2.0            | N/A                   | 20                                  | +             | 75     |
| BTMA                 | PPO                                                                                | Benzyltrimethyl ammonium                       | 2.04             | 26                   | 65.7               | 12                 | 50             | 39.4                   | 4.4            | N/A                   | 20                                  | -             | 75     |
| SCQA                 | PPO                                                                                | side-chain-type                                | 1.80             | 41                   | 79.0               | 15                 | 50             | 40.5                   | 8.0            | N/A                   | 20                                  | -             | 75     |
| LSCQA                | PPO                                                                                | long side-chain-type                           | 1.67             | 39                   | 55.7               | 12                 | 50             | 39.0                   | 2.1            | N/A                   | 20                                  | +             | 75     |
| PSU-PVP75%           | poly(arylene ether sulfone) and poly(vinylpyrrolidone)                             | pyrrolidone                                    | N/A              | N/A                  | N/A                | N/A                | A wide range   | 5                      | 75             | 130                   | N/A                                 | +             | 76     |
| BPI-c-PVBC/OH 1:2    | poly[2-2'-(m-phenylene)-5-5'-bibenzimidazole] co-poly(vinylbenzyl chloride) (PVBC) | DABCO                                          | 1.74             | 30                   | 45                 | 23                 | N/A            | N/A                    | N/A            | N/A                   | 80                                  | +             | 77     |



| Membrane             | Polymeric backbone                                                                | Functional group                                                        | Properties       |                      |                    |                    |                |                        |                |                       | Conductivity measurement temp. (°C) | Applied in EW | Refs. |
|----------------------|-----------------------------------------------------------------------------------|-------------------------------------------------------------------------|------------------|----------------------|--------------------|--------------------|----------------|------------------------|----------------|-----------------------|-------------------------------------|---------------|-------|
|                      |                                                                                   |                                                                         | IEC <sup>a</sup> | Conductivity (mS/cm) | Water uptake (wt%) | Swelling ratio (%) | Thickness (µm) | Tensile strength (Mpa) | Elongation (%) | Young's modulus (MPa) |                                     |               |       |
| BPI-c-PVBC/OH 1:3    | poly[2-2'-(m-phenylene)-5-5'-bibenzimidazole] copoly(vinylbenzyl chloride) (PVBC) | DABCO                                                                   | 1.97             | 44                   | 52                 | 24                 | N/A            | N/A                    | N/A            | N/A                   | 80                                  | +             | 77    |
| ABPBI-c-PVBC/OH 1:2  | Poly(2,5-benzimidazole) (ABPBI) co - poly(vinylbenzyl chloride) (PVBC)            | DABCO                                                                   | 1.70             | 56                   | 51                 | 90                 | N/A            | N/A                    | N/A            | N/A                   | 90                                  | +             | 77    |
| C-PVaf-ABPBI         | Polyvinyl alcohol (PVA) nanofiber/ABPBI                                           | polyvinyl alcohol (PVA) nanofibers crosslinked with glutaraldehyde (GA) | N/A              | 41                   | 55                 | 17                 | 30-45          | 5.0                    | 6              | 1033                  | 80                                  | +             | 78    |
| C-PVA-ABPBI          | Polyvinyl alcohol (PVA) /ABPBI                                                    | polyvinyl alcohol (PVA) nanofibers crosslinked with glutaraldehyde (GA) | N/A              | 48                   | 67                 | 14                 | 30-45          | 2.8                    | 16             | 64                    | 80                                  | -             | 78    |
| QPAF-4               | perfluoroalkylene and fluorene                                                    | hexyltrimethylammonium groups                                           | 1.47             | 86.2                 | 105                | N/A                | 50             | 22.7                   | 269            | N/A                   | 80                                  | -             | 79    |
| PP-BTMA              | Aryl-Ether                                                                        | Polyaromatics                                                           | 2                | 10                   | 116                | N/A                | 20-40          | N/A                    | N/A            | N/A                   | 30                                  | -             | 80    |
| PP-HTMA              | Aryl-Ether                                                                        | Polyaromatics                                                           | 2.4              | 14                   | 109                | N/A                | 20-40          | N/A                    | N/A            | N/A                   | 30                                  | -             | 80    |
| PPA-HTMA             | Aryl-Ether                                                                        | Polyaromatics                                                           | 2.1              | 15                   | 453                | N/A                | 20-40          | N/A                    | N/A            | N/A                   | 30                                  | -             | 80    |
| PSBFP-TMA            | poly(2,2' - spirobifluorene-alt-1,3-phenylene)                                    | Trimethyl ammonium                                                      | 1.2              | 23.1                 | 11.1               | 17                 | N/A            | N/A                    | N/A            | N/A                   | 70                                  | -             | 81    |
| PSBFBP-TMA           | poly(2,20 - spirobifluorene-alt-4,4' - biphenylene)                               | Trimethyl ammonium                                                      | 2.3              | 86.2                 | 24.5               | 38                 | N/A            | N/A                    | N/A            | N/A                   | 70                                  | -             | 81    |
| F-PAE                | polyaromatics                                                                     | BTMA                                                                    | 2.7              | 46                   | 99                 | N/A                | N/A            | 30                     | 9.8            | N/A                   | 80                                  | +             | 82    |
| ATM-PP               | polyaromatics                                                                     | BTMA                                                                    | 1.7              | 37                   | 70                 | N/A                | N/A            | 42                     | 27             | N/A                   | 80                                  | +             | 82    |
| PBI linear           | Polybenzimidazol                                                                  | Polybenzimidazol                                                        | N/A              | 50                   | N/A                | 19                 | N/A            | 94                     | 74             | 2554                  | 22                                  | +             | 83    |
| CL PBI (crosslinked) | Polybenzimidazol                                                                  | Polybenzimidazol                                                        | N/A              | 50                   | N/A                | N/A                | N/A            | 36                     | 1.7            | 2907                  | 22                                  | +             | 83    |
| Thermally cured PBI  | Polybenzimidazol                                                                  | Polybenzimidazol                                                        | N/A              | 50                   | N/A                | 47                 | N/A            | 139                    | 59             | 2914                  | 22                                  | +             | 83    |

| Membrane                            | Polymeric backbone                            | Functional group                                                                                                                                | Properties       |                      |                    |                    |                |                        |                |                       | Conductivity measurement temp. (°C) | Applied in EW | Refs. |
|-------------------------------------|-----------------------------------------------|-------------------------------------------------------------------------------------------------------------------------------------------------|------------------|----------------------|--------------------|--------------------|----------------|------------------------|----------------|-----------------------|-------------------------------------|---------------|-------|
|                                     |                                               |                                                                                                                                                 | IEC <sup>a</sup> | Conductivity (mS/cm) | Water uptake (wt%) | Swelling ratio (%) | Thickness (µm) | Tensile strength (Mpa) | Elongation (%) | Young's modulus (MPa) |                                     |               |       |
| L-ABPBI (C <sub>KOH</sub> = 1.9 M)  | ABPBI                                         | ABPBI                                                                                                                                           | N/A              | 7                    | 37.8               | 50                 | 90-120         | N/A                    | N/A            | N/A                   | 22                                  | +             | 84    |
| LC-ABPBI (C <sub>KOH</sub> = 1.9 M) | ABPBI                                         | ABPBI                                                                                                                                           | N/A              | 8                    | 33.8               | 50                 | 90-120         | N/A                    | N/A            | N/A                   | 22                                  | +             | 84    |
| PQDP-1                              | poly (quinquephenylene-co-diphenylene)        | piperidinium                                                                                                                                    | 1.77             | 67.2                 | 33                 | 4.2                | 20-30          | 43                     | 9.8            | 880                   | 80                                  | -             | 85    |
| PQDP-3                              | poly (quinquephenylene-co-diphenylene)        | piperidinium                                                                                                                                    | 2.44             | 140.5                | 90                 | 36.5               | 20-30          | 41                     | 16.6           | 980                   | 80                                  | -             | 85    |
| SDQEO                               | PPO                                           | alkoxyl- extender-containing dual quaternary ammonium                                                                                           | 1.13             | 87.3                 | 120                | 30                 | 50             | 10.5                   | 27.3           | N/A                   | 80                                  | -             | 86    |
| PFTP                                | poly(fluorenyl aryl piperidinium)             | piperidinium                                                                                                                                    | 2.81             | 208                  | 45                 | 16                 | 20             | 84.5                   | 25.6           | 1580                  | 80                                  | -             | 87    |
| m-PTP-20Q                           | oly(aryl piperidinium) (PAP)                  | piperidinium                                                                                                                                    | 3.06             | 144.2                | 51                 | 6.25               | 60-70          | N/A                    | N/A            | N/A                   | 80                                  | -             | 88    |
| O-PDQA-3                            | aryl-ether free poly(aryl piperidinium) (PBP) | piperidinium cations and ethylene oxide spacers                                                                                                 | 1.93             | 106                  | 46.1               | 12.5               | N/A            | N/A                    | N/A            | N/A                   | 80                                  | -             | 89    |
| PP80N20                             | tetrakis(bromomethyl) monomers                | spirocyclic QA                                                                                                                                  | 3.2              | 51.3                 | 266                | 11                 | N/A            | N/A                    | N/A            | N/A                   | 80                                  | -             | 90    |
| Q-CLP1                              | poly(benzimidazolium-imide)-                  | triazolium                                                                                                                                      | 1.36             | 84                   | 58                 | 17                 | N/A            | 15.37                  | 7.80           | N/A                   | 80                                  | -             | 91    |
| BiPyBPPEEK-50%                      | polyetheretherketone (PEEK)                   | pyridine                                                                                                                                        | 3.51             | 36.99                | 16                 | 4.4                | N/A            | 66.0                   | 4.5            | 2400                  | 80                                  | -             | 92    |
| QPAES/QBGO-3.0                      | poly (arylene ether sulfone) (QPAES)          | 1,4-diazabicyclo [2,2,2]octane and 1,6-dibromohexane, and subsequently used to prepare multi-cationic oligomer brushes-decorated graphene oxide | 1.68             | 58.7                 | 103                | 13.6               | 60             | 32.4                   | 9.1            | 1360                  | 80                                  | -             | 93    |
| PAEK-HQACz-0.7                      | poly(arylene ether ketone) copolymers         | Long alkyl densely quaternized carbazole derivative pendant                                                                                     | 1.88             | 98.1                 | 46.4               | 13.5               | N/A            | 32.5                   | 43.5           | N/A                   | 80                                  | -             | 94    |
| PBP-BOP-ASU 8%                      | poly(4-((1,1'-biphenyl)-4-yl)piperidine)(PBP) | long-chain 3-(3-(1-(8-bromooctyl) piperidin-4-yl) propyl)- 6-azaspiro[5.5] undecan-6-ium bromide(BOP-ASU)                                       | 2.65             | 117                  | 140                | 32                 | N/A            | N/A                    | N/A            | N/A                   | 80                                  | -             | 95    |
| PBP-ASU                             | poly(4-((1,1'-biphenyl)-4-yl)piperidine)(PBP) | ASU                                                                                                                                             | 2.82             | 91                   | 132.98             | 26                 | N/A            | N/A                    | N/A            | N/A                   | 80                                  | -             | 95    |

| Membrane        | Polymeric backbone                                                                                                                                                                                                                       | Functional group                                                                                  | Properties       |                      |                    |                    |                |                        |                |                       | Conductivity measurement temp. (°C) | Applied in EW | Refs. |
|-----------------|------------------------------------------------------------------------------------------------------------------------------------------------------------------------------------------------------------------------------------------|---------------------------------------------------------------------------------------------------|------------------|----------------------|--------------------|--------------------|----------------|------------------------|----------------|-----------------------|-------------------------------------|---------------|-------|
|                 |                                                                                                                                                                                                                                          |                                                                                                   | IEC <sup>a</sup> | Conductivity (mS/cm) | Water uptake (wt%) | Swelling ratio (%) | Thickness (µm) | Tensile strength (Mpa) | Elongation (%) | Young's modulus (MPa) |                                     |               |       |
| CP2             | poly(styrene-b-(ethylene-co-butylene)-b-styrene) (SEBS)<br>poly(styrene-b-(ethylene-co-butylene)-b-styrene) (SEBS)<br>poly(styrene-b-(ethylene-co-butylene)-b-styrene) (SEBS)<br>Poly(styrene-b-(ethylene-co-butylene)-b-styrene) (SEBS) | branch polyethyleneimine (BPEI)                                                                   | 3.34             | 66.63                | 18.16              | 5.5                | N/A            | 26.17                  | 443            | N/A                   | 80                                  | -             | 96    |
| CP3             | SEBS                                                                                                                                                                                                                                     | BPEI                                                                                              | 2.47             | 19.87                | 15.67              | 4.89               | N/A            | 28.78                  | 511            | N/A                   | 80                                  | -             | 96    |
| PPEEK:PEG 80:20 | poly(ether ether ketone) (QPPEEK) and poly(ethylene glycol) (PEG) as the crosslinker                                                                                                                                                     | quatarnary phosphonium                                                                            | 1.01             | 102                  | 139                | 20                 | 100            | 13.7                   | 48             | 338                   | 80                                  | -             | 97    |
| MPyPPO          | PPO                                                                                                                                                                                                                                      | N-methylpyrrolidinium                                                                             | 1.73             | 84                   | 92.9               | 23.9               | N/A            | 15.52                  | 25.45          | N/A                   | 80                                  | -             | 98    |
| qPBPTT-5        | Poly(biphenyl N-methyl-4-piperidone 1,1,1-Trifluoroacetone 1,3,5-Triphenylbenzene)                                                                                                                                                       | piperidine                                                                                        | 1.93             | 116.92               | 61.71              | 19.41              | 30             | 10.89                  | 8.26           | N/A                   | 80                                  | -             | 99    |
| m-TPNPiQA       | poly(terphenylene) backbone                                                                                                                                                                                                              | tethered with piperidinium groups                                                                 | 2.66             | 68.7                 | 2.54               | 52.25              | 50             | N/A                    | N/A            | N/A                   | 80                                  | -             | 100   |
| HyAEM-MP-180    | polychloromethylstyrene-b-polyethylene-b-polychloromethylstyrene (PCMS-b-PE-b-PCMS)                                                                                                                                                      | benzylmethylpiperidinium                                                                          | 2.1              | 179                  | 33                 | 16.5               | N/A            | 23.9                   | 29.4           | 39.0                  | 80                                  | -             | 101   |
| PPO-DMP         | PPO                                                                                                                                                                                                                                      | six-membered dimethyl piperidinium                                                                | 1.98             | 71.8                 | 125.7              | 29.6               | 50             | 43.7                   | 2.7            | N/A                   | 80                                  | -             | 102   |
| PPO-ASU         | PPO                                                                                                                                                                                                                                      | ASU                                                                                               | 1.85             | 76.5                 | 148.6              | 42.0               | 50             | 20.4                   | 1.3            | N/A                   | 80                                  | -             | 102   |
| NPPO-2QA-1.85   | Azide-modified PPO (NPPO)                                                                                                                                                                                                                | Alkyne side chain precursor containing terminal doubleQA groups (TABB)                            | 1.85             | 47.22                | 33.70              | 8.93               | N/A            | N/A                    | N/A            | N/A                   | 30                                  | -             | 103   |
| AEM-9.09        | benzonorbornadiene derivative (BenzoNBD-Bis(ImBr <sup>+</sup> -Im <sup>+</sup> )) grafted                                                                                                                                                | multi- imidazolium cations side-chains combined the rigid alkyl spacer and flexible alkoxy spacer | 1.41             | 100.74               | 52                 | 35.3               | 58             | 24.7                   | 53.8           | 318.1                 | 80                                  | -             | 104   |
| NAPAEK-Q-100    | poly(arylene ether ketone)s                                                                                                                                                                                                              | Naphthalene                                                                                       | 1.46             | 74                   | 24.3               | 4.5                | N/A            | 44.43                  | 6.39           | 2009                  | 100                                 | -             | 105   |

| Membrane                      | Polymeric backbone                                                                                                                                                                                                         | Functional group                                                  | Properties       |                      |                     |                    |                |                        |                |                       | Conductivity measurement temp. (°C) | Applied in EW | Refs. |
|-------------------------------|----------------------------------------------------------------------------------------------------------------------------------------------------------------------------------------------------------------------------|-------------------------------------------------------------------|------------------|----------------------|---------------------|--------------------|----------------|------------------------|----------------|-----------------------|-------------------------------------|---------------|-------|
|                               |                                                                                                                                                                                                                            |                                                                   | IEC <sup>a</sup> | Conductivity (mS/cm) | Water uptake (wt%)  | Swelling ratio (%) | Thickness (µm) | Tensile strength (Mpa) | Elongation (%) | Young's modulus (MPa) |                                     |               |       |
| VIB5/PMS2/PBI 0.5             | N,N-butylvinylimidazolium with p-methylstyrene and polybenzimidazole,                                                                                                                                                      | Imidazolium                                                       | 2.06             | 147                  | 320.19 <sup>j</sup> | 10.77 <sup>j</sup> | 70             | N/A                    | N/A            | N/A                   | 100                                 | -             | 106   |
| QPAE/GO-(APTS-c-PTMA) 0.7 wt% | quaternary ammonium functionalized graphene oxide (Q-GO) into quaternized poly(arylene ether) (QPAE) random copolymer containing 3-aminopropyl)triethoxysilane (APTS) and (3-bromopropyl)trimethyl ammonium bromide (PTMA) | PTMA                                                              | 1.45             | 114.2                | 31.2                | 13.2               | 27             | 14.1                   | 5.3            | N/A                   | 90                                  | -             | 107   |
| PDPF-DMP                      | PDPF                                                                                                                                                                                                                       | DMP                                                               | 2.15             | 124                  | 111                 | 30                 | N/A            | N/A                    | N/A            | N/A                   | 80                                  | -             | 108   |
| Q-PAES/PPO-55                 | Quaternized poly(arylene ether sulfone)/PPO belnded                                                                                                                                                                        | triethylamine (TEA)                                               | 1.79             | 90.9                 | 45.4                | 25.7               |                | N/A                    | N/A            | N/A                   | 90                                  | -             | 109   |
| A-PEI-8                       | Alkalized poly(ether imide)                                                                                                                                                                                                | imidazolium                                                       | 1.23             | 44.2                 | 40.3                | 19.2               | 31             | 30.2                   | 9.4            | 1400                  | 90                                  | -             | 110   |
| PPO-22-3QA8F                  | a tri-quaternary ammonium side chain to the poly(phenylene oxide) (PPO) backbone                                                                                                                                           | Terminal alkyne-containing 3-[(2-perfluorooctyl)ethoxy]prop-1-yne | 1.58             | 83                   | 10.2                | 3.7                | 20-30          | N/A                    | N/A            | N/A                   | 90                                  | -             | 111   |
| QN-PAEK/rGO5.0wt %            | poly(arylene ether ketone) (PAEK)/ reduced graphene oxide (rGO)                                                                                                                                                            | bearing fluorenyl group                                           | 1.32             | 116.8                | 79                  | 26                 | 30             | 40.8                   | 4.9            | 400                   | 90                                  | -             | 112   |
| QPAEK-CN-0.5                  | PAEK with various g-C <sub>3</sub> N <sub>4</sub> nanosheetsconten                                                                                                                                                         | alkaline quaternary ammonium groups and amine/imine groups        | 1.31             | 38.6                 | 30.2                | 6.1                | N/A            | 35.3                   | 86             | 1370                  | 90                                  | -             | 113   |
| GT82-5                        | poly (norbornene) (PNB)                                                                                                                                                                                                    | N,N,N',N'- tetramethyl-1,6-hexanediamine (TMHDA),                 | 3.84             | 212                  | 122                 | N/A                | N/A            | N/A                    | N/A            | N/A                   | 80                                  | -             | 114   |
| PPO5-4QPip-2.6                | PPO                                                                                                                                                                                                                        | piperidinium                                                      | 2.6              | 221                  | 115                 | N/A                | 50             | N/A                    | N/A            | N/A                   | 80                                  | -             | 115   |
| QPAF-DMBA                     | quaternized aromatic/perfluoroaklyl copolymer (QPAF)                                                                                                                                                                       | dimethylbutylamine (DMBA)                                         | 1.33             | 152                  | 53                  | N/A                | 45             | N/A                    | N/A            | N/A                   | 80                                  | -             | 116   |
| T20NC6NC5N                    | PPO                                                                                                                                                                                                                        | hexyl and pentyl spacers                                          | 2.52             | 176                  | 135                 | 18                 | 100            | N/A                    | N/A            | N/A                   | 80                                  | -             |       |
| PBP-20Q4                      | PBP                                                                                                                                                                                                                        | Piperidinium                                                      | 3.64             | 155                  | 242                 | 42                 | 60             | 35                     | 45             | N/A                   | 80                                  | -             | 117   |
| BeC30%-P                      | polyvinyl alcohol                                                                                                                                                                                                          | grafted bis-crown ether                                           | 3.51             | 235                  | 133                 |                    |                |                        |                |                       | 80                                  | -             | 118   |

**Table S2.** *Ex-situ* alkaline stability data of selected AEMs.

| Membrane              | Temperature [°C] | OH <sup>-</sup> conc. [M]           | Durability or half life time [h] | %degradation | Measurement Method                  | Applied in EW | Ref.       |
|-----------------------|------------------|-------------------------------------|----------------------------------|--------------|-------------------------------------|---------------|------------|
| PTP-75                | 80               | 1                                   | 934                              | 41           | Conductivity                        | +             | 1          |
|                       | 80               | 1                                   | 934                              | 47           | NMR                                 |               |            |
| PTP-85                | 80               | 1                                   | 934                              | 40           | Conductivity                        | +             | 1          |
|                       | 80               | 1                                   | 934                              | 36           | NMR                                 |               |            |
| PTP-90                | 80               | 1                                   | 934                              | 73           | Conductivity                        | +             | 1          |
|                       | 80               | 1                                   | 934                              | 62           | NMR                                 |               |            |
| PAni-0.87             | 80               | 1                                   | 48                               | 4            | Dry weight ionic, conductivity, IEC | -             | 12         |
| PAni-0.92             | 80               | 1                                   | 48                               | 4            |                                     | -             | 12         |
| PAni-1.03             | 80               | 1                                   | 48                               | 4            |                                     | +             | 12         |
| PFOTPh-TMA-C6         | 80               | 8                                   | 168                              | 13.8         | conductivity                        | +             | 6          |
| HDPE-AEM              | 80               | RH ¼ 100% N <sub>2</sub> atmosphere | 500                              | 8            | conductivity                        | -             | 25, 24     |
| LDPE-AEM              | 80               | RH ¼ 100% N <sub>2</sub> atmosphere | 500                              | 6.2          | conductivity                        | -             | 25, 24, 26 |
| C4-AEM                | 80               | 1                                   | 672                              | 13           | IEC                                 |               | 25         |
| SEBS-BTMA             | 60               | 1                                   | 360                              | 13.6         | conductivity                        |               | 25         |
| SEBS-CH2-QA-1.5       | 60               | 1                                   | 360                              | 7.7          | conductivity                        |               | 25         |
| XL100-SEBS-C5-TMA-0.8 | 80               | 1                                   | 500                              | 2.4          | conductivity                        |               | 25         |
| P1.25-OH              | 80               | 0.1                                 | 239                              | 53           | conductivity                        |               | 25         |
| XL35-rPNB-X60-Y40     | 80               | 1                                   | 576                              | 1.4          | conductivity                        |               | 25         |
| HC-[1]498 [2]200      | 80               | 1                                   | 720                              | 4.2          | conductivity                        |               | 25         |
| PNB-X62-Y38           | 80               | 1                                   | 1200                             | 0.8          | conductivity                        |               | 25         |
| H22C9N                | 80               | 1                                   | 500                              | 9.6          | conductivity                        |               | 25         |
| F20C9N                | 80               | 1                                   | 500                              | 8.9          | conductivity                        |               | 25         |
| ATMPP                 | 22               | 4                                   | 336                              | 33           | conductivity                        |               | 25         |
| HTMA-DAPP             | 80               | 4                                   | 336                              | 4.6          | conductivity                        |               | 40, 25     |
|                       | 80               | 4                                   | 336                              | 0            | IEC                                 |               | 40, 25     |
|                       | 80               | 4                                   | 3000                             | 39           | conductivity                        |               | 25         |
|                       | 80               | 4                                   | 3000                             | 8            | IEC                                 |               | 25         |
|                       | 80               | 0.5                                 | 11,160                           | 72           | conductivity                        |               | 25         |

| Membrane                 | Temperature [°C] | OH <sup>-</sup> conc. [M] | Durability or half life time [h] | %degradation | Measurement Method | Applied in EW | Ref.    |
|--------------------------|------------------|---------------------------|----------------------------------|--------------|--------------------|---------------|---------|
| QPAF (C6)-2              | 60               | 1                         | 400                              | 90           | conductivity       |               | 25      |
| QP-QAF3                  | 80               | 1                         | 1000                             | 15           | conductivity       |               | 25      |
| PAImEE (12)              | 80               | 10                        | 240                              | 6.1          | NMR                |               | 43, 25  |
| BPN1                     | 95               | 1                         | 1440                             | 8            | IEC                |               | 25      |
| <i>m</i> -TPN1           | 95               | 1                         | 1440                             | 2            | Conductivity       |               | 25, 119 |
| FLN-55                   | 80               | 1                         | 500                              | 2            | IEC                |               | 25      |
| PTPipQ6                  | 90               | 2                         | 720                              | 64           | NMR                |               | 25      |
| PAP-TP-85                | 100              | 1                         | 2000                             | 3            | IEC                |               | 9, 25   |
| PTPipQ1                  | 90               | 2                         | 360                              | 5            | IEC                |               | 46      |
| PVBC-MPy/15%PEK-cardo    | 60               | 1                         | 432                              | 15           | Conductivity       | -             | 47      |
|                          | 80               | 1                         | 432                              | 9            |                    |               |         |
|                          | 60               | 6                         | 432                              | 16           |                    |               |         |
| PVBC-MPy/25%PEK-cardo    | 60               | 1                         | 432                              | 5            | Conductivity       | -             | 47      |
|                          | 80               | 1                         | 432                              | 15           |                    |               |         |
|                          | 60               | 6                         | 432                              | 20           |                    |               |         |
| PVBC-MPy/35%PEK-cardo    | 60               | 1                         | 432                              | 9            | Conductivity       | +             | 47      |
|                          | 80               | 1                         | 432                              | 15           |                    |               |         |
|                          | 60               | 6                         | 432                              | 19           |                    |               |         |
| PVBC-MPy/40%PEK-cardo    | 60               | 1                         | 432                              | 7            | Conductivity       | -             | 47      |
|                          | 80               | 1                         | 432                              | 11           |                    |               |         |
|                          | 60               | 6                         | 432                              | 25           |                    |               |         |
| PST-TMA <sup>+</sup>     | 60               | 1                         | 168                              | 10           | NMR                | +             | 49      |
|                          | 60               | 1                         | 168                              | 37           | Conductivity       |               |         |
|                          | 60               | 2                         | 168                              | 44           | Conductivity       |               |         |
|                          | 60               | 6                         | 168                              | 13           | NMR                |               |         |
| PST-DMP <sup>+</sup>     | 60               | 1                         | 168                              | 25           | NMR                | +             | 49      |
|                          | 60               | 1                         | 168                              | 49           | Conductivity       |               |         |
|                          | 60               | 2                         | 168                              | 67           | Conductivity       |               |         |
|                          | 60               | 6                         | 168                              | 38           | NMR                |               |         |
| PPO24-BIM (bromide form) | 80               | 1                         | 336                              | 65           | Conductivity       | +             | 13      |
| FAA-30                   | 80               | 1                         | 336                              | 8            | Conductivity       | +             | 13      |
| Tokuyama A201            | 80               | 1                         | 336                              | 0            | Conductivity       | +             | 13      |
| PSEBS-CM-DABCO           | 50               | 3.8                       | 168                              | 13           | Conductivity       | +             | 54      |

| Membrane            | Temperature [°C] | OH <sup>-</sup> conc. [M] | Durability or half life time [h] | %degradation | Measurement Method | Applied in EW | Ref.   |
|---------------------|------------------|---------------------------|----------------------------------|--------------|--------------------|---------------|--------|
|                     | 50               | 3.8                       | 168                              | 8            | IEC                |               |        |
|                     | 60               | 3.8                       | 168                              | 47           | Conductivity       |               |        |
|                     | 60               | 3.8                       | 168                              | 33           | IEC                |               |        |
| PAEK-APMP75         | 60               | 5.3                       | 672                              | 15           | IEC                | +             | 55     |
| PAEK-APMP100        | 60               | 5.3                       | 672                              | 25           | IEC                | +             | 55     |
| SEBS-Pi-73%         | 80               | 1                         | 576                              | 25           | Conductivity       | +             | 59     |
|                     |                  |                           |                                  | 22           | IEC                |               |        |
| PBP-ASU-PPO         | 80               | 1                         | 2000                             | 13.6         | IEC                | +             | 60     |
| BPN1-100            | 95               | 1                         | 1440                             | 11           | IEC                | +             | 25, 67 |
|                     | 95               | 1                         | 1440                             | 8            | NMR                |               |        |
| TPN1-100            | 95               | 1                         | 1440                             | 9            | IEC                | +             | 25, 44 |
|                     | 95               | 1                         | 1440                             | 2.3          | NMR                |               |        |
| PAImBB(14)          | 80               | 10                        | 240                              | 2.3          | NMR                | +             | 43     |
| QPC-TMA             | 80               | 1                         | 1000                             | 0            | NMR<br>IEC         | +             | 68     |
| PVBC-MPy M2         | 80               | 1                         | 600                              | 13           | Conductivity       | +             | 69     |
| PVBC-MPy M4         | 80               | 1                         | 600                              | 22           | Conductivity       | +             | 69     |
| PVBC-MPy M6         | 80               | 1                         | 600                              | 18           | Conductivity       | +             | 69     |
| PISPVA46            | 60               | 0.5                       | 240                              | 56.2         | Conductivity       | +             | 73     |
| PISPVA37            | 60               | 0.5                       | 240                              | 44.9         | Conductivity       | +             | 73     |
| PISPVA28            | 60               | 0.5                       | 240                              | 39.7         | Conductivity       | +             | 73     |
| QMter-co-Mpi- 100%  | 60               | 1                         | 43                               | 6            | IEC                | +             | 74     |
|                     | 60               | 1                         | 43                               | 8            | Conductivity       |               |        |
| BPi                 | 80               | 1                         | 560                              | 48           | Conductivity       | -             | 75     |
| SCPi                | 80               | 1                         | 560                              | 57           | Conductivity       | +             | 75     |
| LSCPi               | 80               | 1                         | 560                              | 2            | Conductivity       | +             | 75     |
| SCQA                | 80               | 1                         | 560                              | 71           | Conductivity       | -             | 75     |
| LSCQA               | 80               | 1                         | 560                              | 16           | Conductivity       | +             | 75     |
| BPI-c-PVBC/OH 1:2   | 60               | 1                         | 480                              | 10           | IEC                | +             | 77     |
| BPI-c-PVBC/OH 1:3   | 60               | 1                         | 480                              | 16           | IEC                | +             | 77     |
| ABPBI-c-PVBC/OH 1:2 | 60               | 1                         | 480                              | 7            | IEC                | +             | 77     |
| QPAF-4              | 80               | 1                         | 1000                             | 0            | Conductivity       | -             | 78     |
| PSBFP-TMA           | 80               | 1                         | 168                              | 0            | Conductivity       | -             | 81     |
| PSBFBP-TMA          | 80               | 1                         | 168                              | 0            | Conductivity       | -             | 81     |
| F-PAE               | 80               | 0.5                       | 2                                | 61% backbone | NMR                | +             | 82     |

| Membrane             | Temperature [°C] | OH <sup>-</sup> conc. [M] | Durability or half life time [h] | %degradation          | Measurement Method | Applied in EW | Ref.   |
|----------------------|------------------|---------------------------|----------------------------------|-----------------------|--------------------|---------------|--------|
|                      |                  |                           |                                  | 12% benzylic position |                    |               |        |
| ATM-PP               | 80               | 0.5                       | 2                                | 0                     | NMR                | +             | 82     |
| PPO-TMA              | 60               | 1                         | 720                              | 70                    | IEC                | +             | 71, 72 |
|                      | 60               | 6                         | 720                              | 83                    | IEC                |               |        |
| PPO-ABCO             | 60               | 1                         | 720                              | 74                    | IEC                | +             | 71, 72 |
| PPO-ABCO             | 60               | 6                         | 720                              | 92                    | IEC                |               |        |
| PBI linear           | 85               | 6                         | 4224                             | 100                   | Conductivity       | +             | 83     |
| CL PBI (crosslinked) | 85               | 6                         | 4224                             | 50                    | Conductivity       | +             | 83     |
| Thermally cured PBI  | 85               | 6                         | 4224                             | 0                     | Conductivity       | +             | 83     |
| MES-PBI (25 wt% KOH) | 88               | 9.5                       | 4968                             | 3                     | Relative mass      | +             | 70     |
| PQDP-1               | 80               | 1                         | 720                              | 3                     | NMR                | -             | 85     |
| SDQEO                | 60               | 1                         | 192                              | 25                    | Conductivity       | -             | 86     |
| PFTP                 | 80               | 1                         | 2000                             | 4                     | NMR                | -             | 120    |
| PFTP                 | 80               | 5                         | 2000                             | 20                    | NMR                | -             | 120    |
| m-PTP-20Q            | 80               | 2                         | 1600                             | 10.55                 | Conductivity       | -             | 88     |
| O-PDQA-3             | 80               | 2                         | 1080                             | 4                     | Conductivity       | -             | 89     |
| O-PDQA-3             | 80               | 2                         | 1080                             | 2.8                   | IEC                | -             | 89     |
| PP80N20              | 80               | 1                         | 1000                             | 30.8                  | Conductivity       | -             | 90     |
| PP80N20              | 80               | 5                         | 1000                             | 41.1                  | Conductivity       | -             | 90     |
| Q-CLP1               | 80               | 2                         | 300                              | 46                    | Conductivity       | -             | 121    |
| BiPyBPPEEK-50%       | 22               | 1                         | 750                              | 11                    | Conductivity       | -             | 92     |
| QPAES/QBGO-3.0       | 60               | 1                         | 240                              | 27                    | Conductivity       | -             | 93     |
| PAEK-HQACz-0.7       | 22               | 4                         | 168                              | 3.9                   | Conductivity       | -             | 94     |
| PBP-BOP-ASU 8%       | 80               | 2                         | 1400                             | 15.59                 | NMR                | -             | 95     |
| PBP-ASU              | 80               | 2                         | 1400                             | 11.37                 | NMR                | -             | 95     |
| CP3                  | 60               | 2                         | 480                              | 20                    | NMR                | -             | 96     |
| PPEEK:PEG 80:20      | 80               | 1                         | 400                              | 15                    | Conductivity       | -             | 97     |
| MPyPPO               | 60               | 1                         | 720                              | 42                    | Conductivity       | -             | 98     |
| PPO-TMA              | 22               | 0.6 ( $\lambda=4$ )       | 646                              | 8                     | NMR                | -             | 122    |
| qPBPTT-5             | 80               | 1                         | 480                              | 13.29                 | Conductivity       | -             | 99     |
| m-TPNPiQA            | 80               | 5                         | 240                              | 6                     | IEC                | -             | 100    |
| HyAEM-MP-180         | 22               | 9                         | 168                              | 50                    | IEC                | -             | 101    |
| NPPO-2QA-1.85        | 60               | 1                         | 168                              | 28                    | NMR                | -             | 103    |
| AEM-9.09             | 60               | 1                         | 504                              | 50                    | Conductivity       | -             | 104    |



| Membrane                         | Temperature [°C] | OH <sup>-</sup> conc. [M] | Durability or half life time [h] | %degradation | Measurement Method | Applied in EW | Ref. |
|----------------------------------|------------------|---------------------------|----------------------------------|--------------|--------------------|---------------|------|
| ETFE-AEM                         | 80               | 1                         | 168                              | 12           | IEC                | -             | 123  |
| NAPAEK-Q-100                     | 22               | 4                         | 168                              | 0.7          | IEC                | -             | 105  |
| VIB5/PMS2/PBI0.5                 | 25               | 2                         | 204                              | 25           | Conductivity       | -             | 106  |
| QPAE/GO-(APTS-c-PTMA)<br>0.7 wt% | 90               | 2                         | 480                              | 20           | IEC                | -             | 107  |
| PDPF-DMP                         | 90               | 2                         | 2400                             | 8.4          | NMR                | -             | 108  |
| Q-PAES/PPO-55                    | 50               | 2                         | 1000                             | 14.7         | IEC                | -             | 109  |
| A-PEI-8                          | 90               | 1                         | 200                              | 72.3         | Conductivity       | -             | 110  |
| PPO-22-3QA8F                     | 80               | 1                         | 504                              | 49           | Conductivity       | -             | 111  |
| QN-PAEK/rGO5.0wt%                | 70               | 2                         | 600                              | 25           | Conductivity       | -             | 112  |
| QPAEK-CN-0.5                     | 60               | 1                         | 240                              | 11           | Conductivity       | -             | 113  |
| GT82-15                          | 80               | 1                         | 1000                             | 1.43         | Conductivity       | -             | 114  |
| PPO5-4QPip-2.1                   | 90               | 1                         | 240                              | 14           | Conductivity, IEC  | -             | 115  |
| QPAF-DMBA                        | 60               | 1                         | 1000                             | 42           | Conductivity       | -             | 116  |
| T20NC6NC5N                       | 80               | 1                         | 500                              | 10           | Conductivity       | -             |      |
| PBP-20Q4                         | 80               | 2                         | 1800                             | 8.2          | Conductivity       | -             | 117  |

**Table S3.** AEMs and their performance in AEMWE cells using liquid electrolyte.

| Membrane electrode assembly (MEA) components         |                      |                        |                                                                                      | Ionomer/ binder | Feed type                                            | Cell Voltage (V) | Current density (A/cm <sup>2</sup> ) | Cell temperature (°C) | Ref.    |
|------------------------------------------------------|----------------------|------------------------|--------------------------------------------------------------------------------------|-----------------|------------------------------------------------------|------------------|--------------------------------------|-----------------------|---------|
| Anode catalyst                                       | Membrane type        | Membrane thickness, μm | Cathode catalyst                                                                     |                 |                                                      |                  |                                      |                       |         |
| CuCoO <sub>3</sub>                                   | Tokuyama A201        | 28                     | Ni/CeO <sub>2</sub> -La <sub>2</sub> O <sub>3</sub> /C                               | PTFE            | 1% K <sub>2</sub> CO <sub>3</sub> /KHCO <sub>3</sub> | 1.9              | 0.47                                 | 50                    | 10      |
| IrO <sub>2</sub>                                     | Fumatech FAA-3-PK-75 | 75                     | Pt/C                                                                                 | PTFE            | 0.5 M KOH                                            | 1.8              | 0.48                                 | 50                    | 53      |
| IrO <sub>2</sub>                                     | Fumatech FAA-3-PK-75 | 75                     | Pt/C                                                                                 | PTFE            | 0.5 M KOH                                            | 1.8              | 0.61                                 | 60                    | 53      |
| IrO <sub>2</sub>                                     | Fumatech FAA-3-PK-75 | 75                     | Pt/C                                                                                 | PTFE            | 0.5 M KOH                                            | 1.8              | 0.625                                | 70                    | 53      |
| IrO <sub>2</sub>                                     | Fumatech FAA-3-PK-75 | 75                     | Pt/C                                                                                 | PTFE            | 0.5 M KOH                                            | 1.8              | 0.87                                 | 80                    | 53      |
| IrO <sub>2</sub>                                     | Fumatech FAA-3-PK-75 | 75                     | Pt/C                                                                                 | PTFE            | 0.5 M KOH                                            | 1.8              | 0.98                                 | 90                    | 53      |
| Li <sub>0.21</sub> Co <sub>2.79</sub> O <sub>4</sub> | QPDTB                | 50                     | Ni                                                                                   | QPDTB           | 0.2 M KOH                                            | 2.2              | 0.3                                  | 20                    | 56, 124 |
| Li <sub>0.21</sub> Co <sub>2.79</sub> O <sub>4</sub> | QPDTB                | 50                     | Ni                                                                                   | QPDTB           | 0.2 M KOH                                            | 2.05             | 0.3                                  | 40                    | 56, 124 |
| Ni/CPs                                               | Tokuyama A201        | 28                     | Ni/CPs                                                                               | —               | 1 M KOH                                              | 1.9              | 0.15                                 | 50                    | 125     |
| NiFe <sub>2</sub> O <sub>4</sub>                     | Tokuyama A201        | 28                     | NiFeCo                                                                               | 5% Nafion       | 1 M KOH                                              | 2.21             | 2.13                                 | 60                    | 126     |
| NiFe <sub>2</sub> O <sub>4</sub>                     | AEMION               | 38                     | NiFeCo                                                                               | 5% Nafion       | 1 M KOH                                              | 2.26             | 2.13                                 | 60                    | 126     |
| NiFe <sub>2</sub> O <sub>4</sub>                     | Sustanion            | 50                     | NiFeCo                                                                               | 5% Nafion       | 1 M KOH                                              | 2.13             | 2.13                                 | 60                    | 126     |
| CuCoO <sub>3</sub>                                   | LDPE-g-VBC           | 60                     | Ni/CeO <sub>2</sub> -La <sub>2</sub> O <sub>3</sub> /C                               | PTFE            | 1% K <sub>2</sub> CO <sub>3</sub> /KHCO <sub>3</sub> | 2.1              | 0.46                                 | 50                    | 58      |
| IrO <sub>2</sub>                                     | SEBS-Pi              | 60                     | Pt/C                                                                                 |                 | 1 M KOH                                              | 2.0              | 0.4                                  | 50                    | 31, 59  |
| IrO <sub>2</sub>                                     | SEBS-Pi              | 60                     | Pt/C                                                                                 |                 | 1 M KOH                                              | 2.0              | 0.5                                  | 80                    | 31, 59  |
| Pd/TNTA web                                          | Tokuyama A201        | 28                     | Pt/C                                                                                 | PTFE            | 2 M NaOH                                             | 2                | 2                                    | 80                    | 127     |
| CuCoO <sub>x</sub> (on Ni foam) Acta's 3030          | Tokuyama A201        | 28                     | Ni/(CeO <sub>2</sub> -La <sub>2</sub> O <sub>3</sub> )/C on carbon paper Acta's 4030 | I2              | 1% K <sub>2</sub> CO <sub>3</sub>                    | 1.91             | 0.4                                  | 60                    | 62      |

| Membrane electrode assembly (MEA) components |                                      |                                   |                                                                          | Ionomer/ binder                                                       | Feed type                         | Cell Voltage (V) | Current density (A/cm <sup>2</sup> ) | Cell temperature (°C) | Ref. |
|----------------------------------------------|--------------------------------------|-----------------------------------|--------------------------------------------------------------------------|-----------------------------------------------------------------------|-----------------------------------|------------------|--------------------------------------|-----------------------|------|
| Anode catalyst                               | Membrane type                        | Membrane thickness, $\mu\text{m}$ | Cathode catalyst                                                         |                                                                       |                                   |                  |                                      |                       |      |
| CuCoO <sub>x</sub> (on Ni foam)              | Fumatech FAA-3                       | 40                                | Ni/(CeO <sub>2</sub> -La <sub>2</sub> O <sub>3</sub> )/C on carbon paper | I2                                                                    | 1% K <sub>2</sub> CO <sub>3</sub> | 1.91             | 0.4                                  | 60                    | 62   |
| CuCoO <sub>x</sub> (on Ni foam)              | Fumatech FAA-3-PP-75                 | 80                                | Ni/(CeO <sub>2</sub> -La <sub>2</sub> O <sub>3</sub> )/C on carbon paper | I2                                                                    | 1% K <sub>2</sub> CO <sub>3</sub> | 1.99             | 0.4                                  | 60                    | 62   |
| CuCoO <sub>x</sub> (on Ni foam)              | Tokuyama A901                        | 10                                | Ni/(CeO <sub>2</sub> -La <sub>2</sub> O <sub>3</sub> )/C on carbon paper | I2                                                                    | 1% K <sub>2</sub> CO <sub>3</sub> | 2.1              | 0.5                                  | 50                    | 61   |
| NiCo <sub>2</sub> O <sub>4</sub>             | Polyethylene based radiation grafted |                                   | Pt                                                                       | Polystyrene- <i>b</i> -poly(ethylene/butylene)- <i>b</i> -polystyrene | 0.1 M KOH                         | 1.65             | 0.1                                  | 60                    | 63   |
| NiAl                                         | HMT-PMBI                             | 34                                | NiAlMo                                                                   | —                                                                     | 1 M KOH                           | 2.1              | 2                                    | 60                    | 128  |
| IrO <sub>2</sub>                             | PTP-90                               | 45                                | Pt/C                                                                     |                                                                       | 1 M NaOH                          | 2.2              | 0.91                                 | 55                    | 129  |
| IrO <sub>2</sub>                             | PTP-90                               | 45                                | Pt/C                                                                     |                                                                       | 1 M NaOH                          | 2.2              | 1                                    | 75                    | 129  |
| IrO <sub>2</sub>                             | PTP-85                               | 45                                | Pt/C                                                                     |                                                                       | 1 M NaOH                          | 2.2              | 0.83                                 | 55                    | 129  |
| IrO <sub>2</sub>                             | PTP-75                               | 45                                | Pt/C                                                                     |                                                                       | 1 M NaOH                          | 2.2              | 0.76                                 | 55                    | 129  |
| IrO <sub>2</sub>                             | Sustainion 37-50                     | 50                                | Pt/C                                                                     |                                                                       | 1 M KOH                           | 1.63             | 1                                    | 60                    | 16   |
| NiFe                                         | Sustainion 37-50                     | 50                                | NiFeCo                                                                   |                                                                       | 1 M KOH                           | 1.9              | 1                                    | 60                    | 16   |
| RANEYs-type-Ni                               | m-PBI                                | 40                                | RANEYs-type-Ni Mo                                                        |                                                                       | 24 wt% KOH                        | 1.8              | 1.7                                  | 80                    | 130  |
| PtRu                                         | PAImEE                               | 13                                | Pt/C                                                                     | PAI                                                                   | 6 M KOH                           | 2.3              | 0.4                                  | 80                    | 43   |
| IrO <sub>2</sub>                             | HTMA-DAPP                            | 26                                | PtRu/C                                                                   | 9 wt% TMA                                                             | 0.1 M NaOH                        | 1.8              | 0.95                                 | 60                    | 40   |
| NiFe                                         | HTMA-DAPP                            | 26                                | PtRu/C                                                                   | 20 wt% TMA                                                            | 0.1 M NaOH                        | 1.8              | 3.2                                  | 60                    | 40   |
| NiFe                                         | HTMA-DAPP                            | 26                                | PtRu/C                                                                   | 20 wt% TMA                                                            | 1 M NaOH                          | 1.8              | 5.3                                  | 60                    | 40   |
| IrO <sub>2</sub>                             | QPC-TMA                              | 50                                | Pt/C                                                                     | QPC-TMA                                                               | 1 M KOH                           | 1.9              | 3.5                                  | 70                    | 68   |
| IrO <sub>2</sub>                             | GT74                                 | 50                                | Pt/C                                                                     | GT-18                                                                 | 3 wt% KOH                         | 1.59             | 0.1                                  | 50                    | 7    |
| IrO <sub>2</sub>                             | GT74                                 | 50                                | Pt/C                                                                     | GT-32                                                                 | 3 wt% KOH                         | 1.62             | 0.1                                  | 50                    | 7    |
| IrO <sub>2</sub>                             | GT74                                 | 50                                | Pt/C                                                                     | GT-0                                                                  | 3 wt% KOH                         | 1.69             | 0.1                                  | 50                    | 7    |
| IrO <sub>2</sub>                             | GT74                                 | 50                                | Pt/C                                                                     | GT-100                                                                | 3 wt% KOH                         | 1.83             | 0.1                                  | 50                    | 7    |
| IrO <sub>2</sub>                             | GT74                                 | 50                                | Pt/C                                                                     | GT-75                                                                 | 3 wt% KOH                         | 2.08             | 0.1                                  | 50                    | 7    |

| Membrane electrode assembly (MEA) components |                     |                        |                  | Ionomer/ binder  | Feed type                              | Cell Voltage (V) | Current density (A/cm <sup>2</sup> ) | Cell temperature (°C) | Ref. |
|----------------------------------------------|---------------------|------------------------|------------------|------------------|----------------------------------------|------------------|--------------------------------------|-----------------------|------|
| Anode catalyst                               | Membrane type       | Membrane thickness, μm | Cathode catalyst |                  |                                        |                  |                                      |                       |      |
| IrO <sub>2</sub>                             | GT74                | 50                     | Pt/C             | GT-82            | 3 wt% KOH                              | 2.11             | 0.1                                  | 50                    | 7    |
| NiFe                                         | PVBC- MPy M2        | 80                     | NiMo             | -----            | 1 M KOH                                | 1.9              | 0.5                                  | 80                    | 69   |
| NiFe                                         | PVBC- MPy M4        | 80                     | NiMo             | -----            | 1 M KOH                                | 1.9              | 0.4                                  | 80                    | 69   |
| NiFe                                         | PVBC- MPy M6        | 80                     | NiMo             | -----            | 1 M KOH                                | 1.9              | 0.6                                  | 80                    | 69   |
| NiFe <sub>2</sub> O <sub>4</sub>             | Sustainion 37-50    |                        | NiFeCo           | PFOTFPh-TMA C6   | 1 M KOH                                | 2.09             | 0.94                                 | 50                    | 17   |
| IrO <sub>2</sub>                             | PFOTFPh-TMA C6      | 20-30                  | Pt/C             | PFOTFPh-TMA C8   | 1 M KOH                                | 1.77             | 1                                    | 80                    | 5, 6 |
| IrO <sub>2</sub>                             | PFOTFPh-TMA C8      | 20-30                  | Pt/C             | PFOTFPh-TMA C10  | 1 M KOH                                | 1.79             | 1                                    | 80                    | 5, 6 |
| IrO <sub>2</sub>                             | PFOTFPh-TMA C10     | 20-30                  | Pt/C             | PFOTFPh-TMA C6   | 1 M KOH                                | 1.84             | 1                                    | 80                    | 5, 6 |
| NiFe <sub>2</sub> O <sub>4</sub>             | Sustainion™ X37-50  | 50                     | NiFeCo           |                  | 1 M KOH                                | 1.9              | 1                                    | 60                    | 18   |
| IrO <sub>2</sub>                             | Sustainion™ X37-50  | 50                     | Pt/C             |                  | 1 M KOH                                | 1.63             | 1                                    | 60                    | 18   |
| CuCoO <sub>x</sub>                           | Tokuyama A201       | 28                     | Pt/C             | AS-4             | 0.1 wt% K <sub>2</sub> CO <sub>3</sub> | 2.22             | 0.8                                  | 50                    | 14   |
| CuCoO <sub>x</sub>                           | Tokuyama A201       | 28                     | Pt/C             | AS-4             | 1 wt% K <sub>2</sub> CO <sub>3</sub>   | 2.05             | 0.8                                  | 50                    | 14   |
| CuCoO <sub>x</sub>                           | Tokuyama A201       | 28                     | Pt/C             | AS-4             | 10 wt% K <sub>2</sub> CO <sub>3</sub>  | 1.87             | 0.8                                  | 50                    | 14   |
| CuCoO <sub>x</sub>                           | Tokuyama A201       | 28                     | Pt/C             | AS-4             | 0.01 M KOH                             | 2.06             | 0.8                                  | 50                    | 14   |
| Ir black                                     | AF1-HNN8-25 Aemion™ | 25                     | Pt/C             | Aemion™ AP1-HNN8 | 1 M KOH                                | 1.75             | 1                                    | 50                    | 15   |
| Ir black                                     | AF1-HNN8-50 Aemion™ | 50                     | Pt/C             | Aemion™ AP1-HNN8 | 1 M KOH                                | 1.8              | 1                                    | 50                    | 15   |
| Ir black                                     | AF1-HNN5-25 Aemion™ | 25                     | Pt/C             | Aemion™ AP1-HNN8 | 1 M KOH                                | 1.81             | 1                                    | 50                    | 15   |
| Ir black                                     | AF1-HNN5-50 Aemion™ | 50                     | Pt/C             | Aemion™ AP1-HNN8 | 1 M KOH                                | 1.92             | 1                                    | 50                    | 15   |
| Ir black                                     | AF1-HNN8-25 Aemion™ | 25                     | Pt/C             | Aemion™ AP1-HNN8 | 0.1 M KOH                              | 1.85             | 1                                    | 50                    | 15   |
| Ir black                                     | AF1-HNN8-50 Aemion™ | 50                     | Pt/C             | Aemion™ AP1-HNN8 | 0.1 M KOH                              | 1.9              | 1                                    | 50                    | 15   |
| Ir black                                     | AF1-HNN5-25 Aemion™ | 25                     | Pt/C             | Aemion™ AP1-HNN8 | 0.11 M KOH                             | 1.98             | 1                                    | 50                    | 15   |
| Ir black                                     | AF1-HNN5-50 Aemion™ | 50                     | Pt/C             | Aemion™ AP1-HNN8 | 0.1 M KOH                              | 2.13             | 1                                    | 50                    | 15   |

| Membrane electrode assembly (MEA) components |                        |                        |                                                          | Ionomer/ binder        | Feed type                           | Cell Voltage (V) | Current density (A/cm <sup>2</sup> ) | Cell temperature (°C) | Ref. |
|----------------------------------------------|------------------------|------------------------|----------------------------------------------------------|------------------------|-------------------------------------|------------------|--------------------------------------|-----------------------|------|
| Anode catalyst                               | Membrane type          | Membrane thickness, μm | Cathode catalyst                                         |                        |                                     |                  |                                      |                       |      |
| Ir black                                     | Fumatech FAA-3-PE-30   | 20-30                  | NiMo                                                     | Fumion FAA-3-solute-10 | 1 M KOH                             | 1.9              | 1                                    | 50                    | 131  |
| Ir black                                     | Fumatech FAA-3-PE-30   | 20-30                  | Pt/C                                                     | Fumion FAA-3-solute-10 | 1 M KOH                             | 1.8              | 1                                    | 50                    | 131  |
| CuCoOx                                       | Mg-Al LDH              | 300                    | Ni/(CeO <sub>2</sub> -La <sub>2</sub> O <sub>3</sub> )/C | PTFE                   | 0.1 M NaOH                          | 2.1              | 0.16                                 | 60                    | 132  |
| CuCoOx                                       | Mg-Al LDH              | 300                    | Ni/(CeO <sub>2</sub> -La <sub>2</sub> O <sub>3</sub> )/C | PTFE                   | 0.1 Na <sub>2</sub> CO <sub>3</sub> | 2.1              | 0.1                                  | 60                    | 132  |
| NiFe <sub>2</sub> O <sub>4</sub>             | Sustainion®37-50       | 50                     | NiFeCo                                                   | Nafion                 | 1 M KOH                             | 1.9              | 1                                    | 60                    | 19   |
| NiFe <sub>2</sub> O <sub>4</sub>             | Fumatech FAS-50        | 50                     | NiFeCo                                                   | Nafion                 | 1 M KOH                             | 1.9              | 0.5                                  | 60                    | 19   |
| NiFe <sub>2</sub> O <sub>4</sub>             | Fumatech FAPQ          | 68-82                  | NiFeCo                                                   | Nafion                 | 1 M KOH                             | 1.9              | 0.17                                 | 60                    | 19   |
| NiFe <sub>2</sub> O <sub>4</sub>             | Neosepta ACM           | 110                    | NiFeCo                                                   | Nafion                 | 1 M KOH                             | 1.9              | 0.05                                 | 60                    | 19   |
| NiFe <sub>2</sub> O <sub>4</sub>             | AMI 7001               | 18000                  | NiFeCo                                                   | Nafion                 | 1 M KOH                             | 1.9              | 0.15                                 | 60                    | 19   |
| NiFe <sub>2</sub> O <sub>4</sub>             | Celazole®PBI           |                        | NiFeCo                                                   | Nafion                 | 1 M KOH                             | 1.9              | 0.07                                 | 60                    | 19   |
| IrO <sub>2</sub>                             | Tokuyama A201          | 28                     | Pt/C                                                     | PTFE                   | 0.5 M KOH                           | 2                | 1.31                                 | 50                    | 133  |
| IrO <sub>2</sub>                             | Sustainion™            |                        | Pt                                                       | PTFE                   | 1 M KOH                             | 1.9              | 4.6                                  | 60                    | 134  |
| Plain nickel foam                            | mes-PBI                | 64                     | Plain nickel foam                                        |                        | 25 wt% KOH                          | 2.3              | 0.7                                  | 80                    | 70   |
| Plain nickel foam                            | mes-PBI                | 60                     | Plain nickel foam                                        |                        | 15 wt% KOH                          | 2.3              | 0.42                                 | 80                    | 70   |
| Plain nickel foam                            | mes-PBI                | 62                     | Plain nickel foam                                        |                        | 5 wt% KOH                           | 2.3              | 0.01                                 | 80                    | 70   |
| Plain nickel foam                            | m-PBI                  | 40                     | Plain nickel foam                                        |                        | 20 wt% KOH                          | 2.3              | 0.9                                  | 80                    | 70   |
| Ni foam                                      | L-ABPBI (linear)       | 90-120                 | Ni foam                                                  |                        | 1.9 M KOH                           | 2                | 0.155                                | 50                    | 84   |
| Ni foam                                      | C-ABPBI (cross-linked) | 90-120                 | Ni foam                                                  |                        | 1.9 M KOH                           | 2                | 0.18                                 | 50                    | 84   |
| Ni foam                                      | L-ABPBI                | 90-120                 | Ni foam                                                  | PTFE                   | 1.9 M KOH                           | 2                | 0.18                                 | 70                    | 84   |
| Ni foam                                      | C-ABPBI                | 90-120                 | Ni foam                                                  | PTFE                   | 1.9 M KOH                           | 2                | 0.22                                 | 70                    | 84   |
| Ni                                           | L-PBI                  | 90-120                 | Ni                                                       | PTFE                   | 30 wt% KOH                          | 2                | 0.15                                 | 80                    | 83   |
| Ni                                           | C-PBI                  | 90-120                 | Ni                                                       | PTFE                   | 30 wt% KOH                          | 2                | 0.12                                 | 80                    | 83   |

| Membrane electrode assembly (MEA) components       |                           |                        |                                  | Ionomer/ binder | Feed type  | Cell Voltage (V) | Current density (A/cm <sup>2</sup> ) | Cell temperature (°C) | Ref. |
|----------------------------------------------------|---------------------------|------------------------|----------------------------------|-----------------|------------|------------------|--------------------------------------|-----------------------|------|
| Anode catalyst                                     | Membrane type             | Membrane thickness, μm | Cathode catalyst                 |                 |            |                  |                                      |                       |      |
| CE-CCO, CuCo-oxide on nickel foam                  | X37-50 Grade T            | 50                     | Pt/C                             | PTFE            | 1 M KOH    | 1.8              | 1.39                                 | 45                    | 22   |
| IrO <sub>2</sub>                                   | Sustainion X37-50 Grade T | 50                     | Pt/C                             | PTFE            | 1 M KOH    | 1.8              | 0.9                                  | 45                    | 22   |
| Cu <sub>0.5</sub> Co <sub>2.5</sub> O <sub>4</sub> | Sustainion X37-50 Grade T | 50                     | Pt/C                             | PTFE            | 1 M KOH    | 1.8              | 1.3                                  | 45                    | 23   |
| IrO <sub>2</sub>                                   | Sustainion X37-50 Grade T | 50                     | Pt/C                             | PTFE            | 1 M KOH    | 1.8              | 1.03                                 | 45                    | 23   |
| Ni foam                                            | Sustainion X37-50 Grade T | 50                     | Pt/C                             | PTFE            | 1 M KOH    | 1.8              | 0.35                                 | 45                    | 23   |
| IrO <sub>2</sub>                                   | PISPVA46                  | 55                     | Pt/C                             | PTFE            | 0.5 M KOH  | 2                | 0.55                                 | 60                    | 135  |
| IrO <sub>2</sub>                                   | PISPVA37                  | 55                     | Pt/C                             | PTFE            | 0.5 M KOH  | 2                | 0.41                                 | 60                    | 135  |
| IrO <sub>2</sub>                                   | PISPVA28                  | 55                     | Pt/C                             | PTFE            | 0.5 M KOH  | 2                | 0.15                                 | 60                    | 135  |
| IrO <sub>2</sub>                                   | QMter-co-Mpi              |                        | Pt/C                             |                 | 0.6 M KOH  | 2                | 0.25                                 | 50                    | 74   |
| IrO <sub>2</sub>                                   | QMter-co-Mpi              |                        | Pt/C                             |                 | 1 M KOH    | 2                | 0.31                                 | 50                    | 74   |
| NiCo <sub>2</sub> O <sub>4</sub>                   | PSEBS-CM-DABCO            | 100                    | NiFe <sub>2</sub> O <sub>4</sub> | PSEBS-CM-DABCO  | 1 wt% KOH  | 2                | 0.065                                | 40                    | 54   |
| NiCo <sub>2</sub> O <sub>4</sub>                   | PSEBS-CM-DABCO            | 100                    | NiFe <sub>2</sub> O <sub>4</sub> | PSEBS-CM-DABCO  | 5 wt% KOH  | 2                | 0.105                                | 40                    | 54   |
| NiCo <sub>2</sub> O <sub>4</sub>                   | PSEBS-CM-DABCO            | 100                    | NiFe <sub>2</sub> O <sub>4</sub> | PSEBS-CM-DABCO  | 10 wt% KOH | 2                | 0.128                                | 40                    | 54   |
| NiCo <sub>2</sub> O <sub>4</sub>                   | PSEBS-CM-DABCO            | 100                    | NiFe <sub>2</sub> O <sub>4</sub> | PSEBS-CM-DABCO  | 15 wt% KOH | 2                | 0.15                                 | 40                    | 54   |
| NiFe <sub>2</sub> O <sub>4</sub>                   | Sustainion® 37-50         | 50                     | NiFeCo                           |                 | 1 M KOH    | 1.9              | 1                                    | 60                    | 19   |
| NiFe <sub>2</sub> O <sub>4</sub>                   | Fumatech FAS-50           | 50                     | NiFeCo                           |                 | 1 M KOH    | 1.9              | 0.5                                  | 60                    | 19   |
| NiFe <sub>2</sub> O <sub>4</sub>                   | Fumatech FAPQ             | 75                     | NiFeCo                           |                 | 1 M KOH    | 1.9              | 0.16                                 | 60                    | 19   |
| NiFe <sub>2</sub> O <sub>4</sub>                   | AMI-7001                  | 450                    | NiFeCo                           |                 | 1 M KOH    | 1.9              | 0.11                                 | 60                    | 19   |
| NiFe-LDH/NF                                        | PVBC-MPy/35%PEK-cardo     | 60                     | MoNi/NF                          | PTFE            | 1 M KOH    | 2                | 0.5                                  | 60                    | 47   |
| IrO <sub>2</sub>                                   | Fumatech FAA-3-50         | 50                     | Pt/C                             |                 | 1 M KOH    | 2                | 0.63                                 | 60                    | 136  |

| Membrane electrode assembly (MEA) components |                                     |                                   |                  | Ionomer/ binder | Feed type            | Cell Voltage (V) | Current density (A/cm <sup>2</sup> ) | Cell temperature (°C) | Ref. |
|----------------------------------------------|-------------------------------------|-----------------------------------|------------------|-----------------|----------------------|------------------|--------------------------------------|-----------------------|------|
| Anode catalyst                               | Membrane type                       | Membrane thickness, $\mu\text{m}$ | Cathode catalyst |                 |                      |                  |                                      |                       |      |
| g-CN-CNF-800                                 | Fumatech FAA-3-50                   | 50                                | Pt/C             |                 | 1 M KOH              | 2                | 0.98                                 | 60                    | 136  |
| FeNiMo-based                                 | Sustainion X37-50 Grade T           | 50                                | NiMo-based       | Nafion          | 1 M KOH              | 1.57             | 1                                    | 80                    | 20   |
| FeNiMo-based                                 | Sustainion X37-50 Grade T           | 50                                | NiMo-based       | Nafion          | 1 M KOH              | 1.62             | 1                                    | 60                    | 20   |
| FeNiMo-based                                 | Sustainion X37-50 Grade T           | 50                                | NiMo-based       | Nafion          | 1 M KOH              | 1.68             | 1                                    | 40                    | 20   |
| FeNiMo-based                                 | Sustainion X37-50 Grade T           | 50                                | NiMo-based       | Nafion          | 1 M KOH              | 1.69             | 0.6                                  | 20                    | 20   |
| APS NiAl-AA                                  | NEOSEPTA (Astom)                    | 220                               | APS NiAlMo-AA    |                 | 1 M KOH              | 1.88             | 0.5                                  | 65                    | 137  |
| APS NiAl-AA                                  | NEOSEPTA (Astom)                    | 220                               | APS NiAlMo-AA    |                 | 0.7 M KOH            | 1.93             | 0.5                                  | 65                    | 137  |
| APS NiAl-AA                                  | NEOSEPTA (Astom)                    | 220                               | APS NiAlMo-AA    |                 | 0.5 M KOH            | 1.95             | 0.5                                  | 65                    | 137  |
| APS NiAl-AA                                  | NEOSEPTA (Astom)                    | 220                               | APS NiAlMo-AA    |                 | 0.3 M KOH            | 2                | 0.5                                  | 65                    | 137  |
| APS NiAl-AA                                  | NEOSEPTA (Astom)                    | 220                               | APS NiAlMo-AA    |                 | 0.1 M KOH            | 2.14             | 0.5                                  | 65                    | 137  |
| NiFe <sub>2</sub> O <sub>4</sub>             | Sustainion Grade T, PTFE reinforced | 50                                | Raney nickel     |                 | 1 M KOH              | 1.8              | 0.84                                 | 60                    | 21   |
| NiFe <sub>2</sub> O <sub>4</sub>             | Sustainion X37-50                   | 50                                | Raney nickel     |                 | 1 M KOH              | 1.8              | 0.74                                 | 60                    | 21   |
| NiFe                                         | PSU-PVP                             | 120                               | NiMo             |                 | 20 wt% KOH           | 1.9              | 0.5                                  | 80                    | 76   |
| Ni-doped FeOOH                               | Sustainion X37-50 Grade T           | 50                                | Pt/C             | Nafion          | 1 M KOH              | 1.7              | 0.92                                 | 50                    | 138  |
| Ni-doped FeOOH                               | Sustainion X37-50 Grade T           | 50                                | Pt/C             | Nafion          | 1 M KOH + 0.5 M NaCl | 1.7              | 0.74                                 | 50                    | 138  |
| Ni-doped FeOOH                               | Sustainion X37-50 Grade T           | 50                                | Pt/C             | Nafion          | 1 M KOH + seawater   | 1.7              | 0.73                                 | 50                    | 138  |
| IrO <sub>2</sub>                             | Sustainion X37-50 Grade T           | 50                                | Pt/C             | PTFE            | 1 M KOH + seawater   | 1.7              | 0.47                                 | 50                    | 138  |
| Ni foam                                      | PBI-c-PVBC/OH (1:3)                 | 24                                | Ni foam          |                 | 1 M KOH              | 1.98             | 0.38                                 | 50                    | 77   |

| Membrane electrode assembly (MEA) components |                                              |                                   |                                  | Ionomer/ binder | Feed type  | Cell Voltage (V) | Current density (A/cm <sup>2</sup> ) | Cell temperature (°C) | Ref. |
|----------------------------------------------|----------------------------------------------|-----------------------------------|----------------------------------|-----------------|------------|------------------|--------------------------------------|-----------------------|------|
| Anode catalyst                               | Membrane type                                | Membrane thickness, $\mu\text{m}$ | Cathode catalyst                 |                 |            |                  |                                      |                       |      |
| Ni foam                                      | ABPBI-c-PVBC/OH (1:2)                        | 90                                | Ni foam                          |                 | 1 M KOH    | 1.98             | 0.38                                 | 50                    | 77   |
| Ni foam                                      | C-PVAF-ABPBI                                 | 30-45                             | Ni foam                          |                 | 15 wt% KOH | 2                | 0.24                                 | 50                    | 139  |
| Ni foam                                      | C-PVAF-ABPBI                                 | 30-45                             | Ni foam                          |                 | 15 wt% KOH | 2                | 0.27                                 | 70                    | 139  |
| Graphene                                     | Selemion AMV                                 | 120                               | Graphene                         |                 | Water      | 2                | 0.09                                 | 30                    | 140  |
| NiCo <sub>2</sub> O <sub>4</sub>             | AMB-commercial (now Pure Water Technologies) |                                   | NiCo <sub>2</sub> O <sub>4</sub> |                 | 1 M KOH    | 2                | 0.25                                 | 50                    | 12   |
| NiCo <sub>2</sub> O <sub>4</sub>             | IPA- commercial (CSIR-CSMCRI)                |                                   | NiCo <sub>2</sub> O <sub>4</sub> |                 | 1 M KOH    | 2                | 0.16                                 | 50                    | 12   |
| NiCo <sub>2</sub> O <sub>4</sub>             | PAni-1.03                                    | 100                               | NiCo <sub>2</sub> O <sub>4</sub> |                 | 1 M KOH    | 2                | 0.4                                  | 50                    | 12   |
| PGM                                          | BPN1-100                                     |                                   | PGM                              | AS4             | 0.5 M NaOH | 2.1              | 0.4                                  | 50                    | 67   |
| PGM                                          | TPN1-100                                     |                                   | PGM                              | AS4             | 0.5 M NaOH | 2.35             | 0.36                                 | 50                    | 67   |
| NiMn <sub>2</sub> O <sub>4</sub>             | Fumatech FAA3-50                             | 50                                | Pt/KB                            |                 | 1 M KOH    | 2                | 0.24                                 | 40                    | 3    |
| NiMn <sub>2</sub> O <sub>4</sub>             | Fumatech FAA3-50                             | 50                                | Pt/KB                            |                 | 1 M KOH    | 2                | 0.37                                 | 50                    | 3    |
| NiMn <sub>2</sub> O <sub>4</sub>             | Fumatech FAA3-50                             | 50                                | Pt/KB                            |                 | 1 M KOH    | 2                | 0.47                                 | 60                    | 3    |
| NiMn <sub>2</sub> O <sub>4</sub>             | Fumatech FAA3-50                             | 50                                | Pt/KB                            |                 | 1 M KOH    | 2                | 0.53                                 | 80                    | 3    |
| IrO <sub>2</sub>                             | HTMA-DAPP                                    | 50                                | PtRu/C                           | HTMA-DAPP       | 0.05 M KOH | 2                | 0.7                                  | 60                    | 141  |
| IrO <sub>2</sub>                             | HTMA-DAPP                                    | 50                                | PtRu/C                           | HTMA-DAPP       | 0.1 M KOH  | 2                | 1.22                                 | 60                    | 141  |
| IrO <sub>2</sub>                             | HTMA-DAPP                                    | 50                                | PtRu/C                           | HTMA-DAPP       | 0.5 M KOH  | 2                | 1.4                                  | 60                    | 141  |
| IrO <sub>2</sub>                             | HTMA-DAPP                                    | 50                                | PtRu/C                           | HTMA-DAPP       | 1 M KOH    | 2                | 1.74                                 | 60                    | 141  |



**Table S4.** AEMs and their performance in AEMWE cells fed with pure water (no liquid electrolyte).

| Membrane electrode assembly (MEA) components         |                         |                        |                                     | Ionomer/binder                                | Feed type | Cell Voltage (V) | Current density A cm <sup>-2</sup> | Cell temp. °C | Ref.   |
|------------------------------------------------------|-------------------------|------------------------|-------------------------------------|-----------------------------------------------|-----------|------------------|------------------------------------|---------------|--------|
| Anode catalyst                                       | Membrane type           | Membrane thickness, μm | Cathode catalyst                    |                                               |           |                  |                                    |               |        |
| Pb <sub>2</sub> Ru <sub>2</sub> O <sub>6.5</sub>     | PSF-TMA                 | 50                     | Pt black                            | PSF-TMA <sup>+</sup> Cl <sup>-</sup>          | Water     | 1.8              | 0.4                                | 50            | 48     |
| Ni-Fe                                                | xQAPS                   | 70                     | Ni-Mo                               | xQAPS                                         | Water     | 1.85             | 0.4                                | 70            | 52     |
| NiCoO <sub>x</sub> :Fe                               | Fumatech FAA-3          | 130                    | Pt/C                                | FAA-3                                         | Water     | 2.0              | 0.37                               | 50            | 142    |
| IrO <sub>2</sub>                                     | Tokuyama A201           | 28                     | Pt black                            | As-4                                          | Water     | 1.6              | 0.1                                | 50            | 148    |
| Cu <sub>0.7</sub> CO <sub>2.3</sub> O <sub>4</sub>   | QPDTB                   | 50                     | Nano Ni                             | Poly(DMAEMA- <i>co</i> -TFEMA- <i>co</i> -BM) | Water     | 1.9              | 0.1                                | 22            | 57     |
| IrO <sub>2</sub>                                     | SEBS-Pi                 | 60                     | Pt/C                                |                                               | Water     | 2                | 0.1                                | 50            | 31, 59 |
| Ce <sub>0.2</sub> MnFe <sub>1.8</sub> O <sub>4</sub> | Fumatech FAA-3-PK-130   | 110-130                | Pt on Ti                            | —                                             | Water     | 1.8              | 0.3                                | —             | 143    |
| NiCo <sub>2</sub> O <sub>4</sub> on steel mesh       | Homemade, not specified |                        | Acta 4030                           | Homemade, not specified                       | Water     | 1.86             | 0.4                                | 60            | 144    |
| Cu <sub>x</sub> Co <sub>3-x</sub> O <sub>4</sub>     | PTFE-qPDTB-OH-          | 25                     | Pt/C                                | q-ammonium polymethacrylate                   | Water     | 2.0              | 0.4                                | 22            | 64     |
| IrO <sub>2</sub>                                     | HTMA-DAPP               | 26                     | PtRu/C                              | 9 wt% TMA                                     | Water     | 1.8              | 0.48                               | 60            | 40     |
| IrO <sub>2</sub>                                     | HTMA-DAPP               | 26                     | PtRu/C                              | 9 wt% TMA                                     | Water     | 1.8              | 0.79                               | 85            | 40     |
| NiFe                                                 | HTMA-DAPP               | 26                     | NiMo/C                              | 20 wt% TMA                                    | Water     | 1.8              | 0.9                                | 85            | 40     |
| NiFe                                                 | HTMA-DAPP               | 26                     | PtRu/C                              | 20 wt% TMA                                    | Water     | 1.8              | 2.7                                | 85            | 40     |
| NiFe-BTC-GNPs MOF                                    | FAA-3-PK-130            | 130                    | MoNi <sub>4</sub> /MoO <sub>2</sub> |                                               | Water     | 1.85             | 0.54                               | 70            | 145    |
| IrO <sub>2</sub>                                     | Fumatech FAA-3-50       | 50                     | Pt/C                                | FAA-3-B                                       | Water     | 1.85             | 0.12                               | 50            | 146    |
| IrO <sub>2</sub>                                     | QPC-TMA                 | 50                     | Pt/C                                | QPC-TMA                                       | Water     | 1.9              | 0.3                                | 70            | 68     |
| IrO <sub>2</sub>                                     | PFOTFPh-TMA C6          | 20-30                  | Pt/C                                | PFOTFPh-TMA C8                                | Water     | 1.94             | 1                                  | 80            | 5, 6   |
| IrO <sub>2</sub>                                     | PFOTFPh-TMA C8          | 20-30                  | Pt/C                                | PFOTFPh-TMA C10                               | Water     | 1.95             | 1                                  | 80            | 5      |
| IrO <sub>2</sub>                                     | PFOTFPh-TMA C10         | 20-30                  | Pt/C                                | PFOTFPh-TMA C6                                | Water     | 2.14             | 1                                  | 80            | 5, 6   |
| CuCoO <sub>x</sub>                                   | Tokuyama A201           | 28                     | Pt/C                                | AS-4                                          | Water     | 2.2              | 0.1                                | 50            | 14     |

| Membrane electrode assembly (MEA) components       |                           |                        |                                                          | Ionomer/binder | Feed type | Cell Voltage (V) | Current density A cm <sup>-2</sup> | Cell temp. °C | Ref. |
|----------------------------------------------------|---------------------------|------------------------|----------------------------------------------------------|----------------|-----------|------------------|------------------------------------|---------------|------|
| Anode catalyst                                     | Membrane type             | Membrane thickness, μm | Cathode catalyst                                         |                |           |                  |                                    |               |      |
| Cu <sub>0.7</sub> Co <sub>2.3</sub> O <sub>4</sub> | mm-qPVBz/Cl-              | 70                     | Ni nano powder                                           | qPVB/Cl-       | Water     | 2.19             | 0.1                                | 25            | 65   |
| Cu <sub>0.7</sub> Co <sub>2.3</sub> O <sub>4</sub> | mm-qPVBz/Cl-              | 70                     | Ni nano powder                                           | qPVB/Cl-       | Water     | 2.05             | 0.1                                | 40            | 65   |
| Cu <sub>0.7</sub> Co <sub>2.3</sub> O <sub>4</sub> | mm-qPVBz/Cl-              | 70                     | Ni nano powder                                           | qPVB/Cl-       | Water     | 1.99             | 0.1                                | 55            | 65   |
| CuCoOx                                             | Mg-Al LDH                 | 300                    | Ni/(CeO <sub>2</sub> -La <sub>2</sub> O <sub>3</sub> )/C | PTFE           | Water     | 2.1              | 0.02                               | 60            | 132  |
| IrO <sub>2</sub>                                   | PPO-TMA                   | 40                     | Pt/C                                                     |                | Water     | 1.8              | 0.24                               | 50            | 72   |
| IrO <sub>2</sub>                                   | PPO-ABCO                  | 40                     | Pt/C                                                     |                | Water     | 1.8              | 0.075                              | 50            | 72   |
| IrO <sub>2</sub>                                   | PISPVA46                  | 55                     | Pt/C                                                     | PTFE           | Water     | 2                | 0.06                               | 60            | 135  |
| IrO <sub>2</sub>                                   | QMter-co-Mpi              |                        | Pt/C                                                     |                | Water     | 2                | 0.06                               | 50            | 74   |
| IrO <sub>2</sub>                                   | LSCPi                     | 50                     | Pt/C                                                     | LSCPi          | Water     | 1.8              | 0.3                                | 50            | 75   |
| IrO <sub>2</sub>                                   | SCPi                      | 50                     | Pt/C                                                     | SCPi           | Water     | 1.8              | 0.2                                | 50            | 75   |
| Graphene                                           | Selemion AMV              | 120                    | Graphene                                                 |                | Water     | 2                | 0.09                               | 30            | 140  |
| NiMPL-PTL                                          | Sustainion X37-50 Grade T | 50                     | NiMPL-PTL                                                |                | Water     | 1.9              | 0.5                                | 60            | 147  |
| IrO <sub>2</sub>                                   | HTMA-DAPP                 | 50                     | PtRu/C                                                   | HTMA-DAPP      | Water     | 2                | 0.44                               | 60            | 141  |

**Table S5.** AEMs and their performance stability in operando AEMWE cells.

| Membrane                  | Anode catalyst                                   | Cathode catalyst                 | Electrolyte                                             | Temperature (°C) | Current density (A cm <sup>-2</sup> ) | Durability (h)                  | Ref. |
|---------------------------|--------------------------------------------------|----------------------------------|---------------------------------------------------------|------------------|---------------------------------------|---------------------------------|------|
| QMter-co-Mpi              | IrO <sub>2</sub>                                 | Pt/C                             | 5.6 wt% KOH                                             | 50               | 0.2                                   | 500 (2.1 V)                     | 74   |
| Tokuyama A201             | IrO <sub>2</sub>                                 | Pt                               | Water                                                   | 50               | 0.2                                   | 535 (2.25 V)                    | 148  |
| Tokuyama A201             | Acta's 3030                                      | Acta's 4030                      | 1 wt% K <sub>2</sub> CO <sub>3</sub> /KHCO <sub>3</sub> | 43               | 0.47                                  | 1000 (2.05 V)                   | 10   |
| PSF-TMA                   | Pb <sub>2</sub> Ru <sub>2</sub> O <sub>6.5</sub> | Pt                               | Pure water                                              | 50               | 0.2                                   | 6 (133.3 mV h <sup>-1</sup> )   | 48   |
| xQAPS                     | Ni-Fe                                            | Ni-Mo                            | Water                                                   | 70               | 0.4                                   | 8 (1.8 V)                       | 52   |
| mes-PBI                   | Ni foam                                          | Ni foam                          | 25 wt% KOH                                              | 80               | 0.2                                   | 72 (1.95 V)                     | 70   |
| PSEBS-CM-DABCO            | NiCo <sub>2</sub> O <sub>4</sub>                 | NiFe <sub>2</sub> O <sub>4</sub> | 10 wt% KOH                                              | 50               | 0.3                                   | 150 (2.267 V)                   | 54   |
| Sustainion® 37-50         | NiFe <sub>2</sub> O <sub>4</sub>                 | NiFeCo                           | 5.6 wt% KOH                                             | 60               | 1                                     | 2000 (1.9 V)                    | 19   |
| Fumatech FAS-50           | NiFe <sub>2</sub> O <sub>4</sub>                 | NiFeCo                           | 5.6 wt% KOH                                             | 60               | 1                                     | 200 (400 μV h <sup>-1</sup> )   | 19   |
| PAImEE(12)                | Pt/C                                             | Pt/C                             | 33.6 wt% KOH                                            | 60               | 0.4                                   | 48 (2.6 V)                      | 43   |
| LSCPi                     | IrO <sub>2</sub>                                 | Pt/C                             | Water                                                   | 50               | 0.2                                   | 35 (16.3 μV h <sup>-1</sup> )   | 75   |
| PVBC-MPy/35%PEK-cardo     | NiFe-LDH/NF                                      | MoNi/NF                          | 5.6 wt% KOH                                             | 60               | 0.5                                   | 46 (2.0 V)                      | 47   |
| SEBS-Pi                   | IrO <sub>2</sub>                                 | Pt/C                             | 5.6 wt% KOH                                             | 50               | 0.4                                   | 100 (2.08 V)                    | 59   |
| Fumatech FAA-3            | Acta's 3030                                      | Acta's 4030                      | 1 wt% K <sub>2</sub> CO <sub>3</sub>                    | 60               | 0.5                                   | 31 (2.04 V)                     | 62   |
| Fumatech FAA-3-PP-75      | Acta's 3030                                      | Acta's 4030                      | 1 wt% K <sub>2</sub> CO <sub>3</sub>                    | 60               | 0.5                                   | 200 (2.38 μV h <sup>-1</sup> )  | 62   |
| NEOSEPTA                  | APS NiAl-AA                                      | APS NiAlMo-AA                    | 1 M KOH                                                 | 65               | 0.5                                   | 112 (350 μV h <sup>-1</sup> )   | 137  |
| Sustainion Grade T        | NiFe <sub>2</sub> O <sub>4</sub>                 | Raney nickel                     | 1 M KOH                                                 | 60               | 1                                     | 12180 (0.7 μV h <sup>-1</sup> ) | 21   |
| Sustainion X37-50         | NiFe <sub>2</sub> O <sub>4</sub>                 | Raney nickel                     | 1 M KOH                                                 | 60               | 1                                     | 10100 (0.7 μV h <sup>-1</sup> ) | 21   |
| Fumatech FAS-50           | NiFe <sub>2</sub> O <sub>4</sub>                 | Raney nickel                     | 1 M KOH                                                 | 60               | 1                                     | 140 (655 μV h <sup>-1</sup> )   | 21   |
| AF1-HNN8-25X              | IrO <sub>2</sub>                                 | Pt/C                             | 1 M KOH                                                 | 50               | 0.5                                   | 17 (2390 μV h <sup>-1</sup> )   | 15   |
| ATM-PP                    | IrO <sub>2</sub>                                 | Pt/C                             |                                                         | 50               | 0.2                                   | 2100                            | 82   |
| PSU-PVP                   | NiFe                                             | NiMo                             | 20 wt% KOH                                              | 80               | 0.5                                   | 700                             | 76   |
| PTP-85                    | IrO <sub>2</sub>                                 | Pt/C                             | 1 M NaOH                                                | 55               | 0.4                                   | 120 (1.61 mV h-1)               | 129  |
| Sustainion X37-50         | NiFe <sub>2</sub> O <sub>4</sub>                 | NiFeCo                           | 1 M KOH                                                 | 50               | 0.2                                   | 1000                            | 17   |
| X37-50 Grade T            | Ni-doped FeOOH                                   | Pt/C                             | 1 M KOH + seawater                                      | 50               | 0.5                                   | 15 (1.72 V)                     | 138  |
| HTMA-DAPP                 | NiFe                                             | PtRu/C                           | Water                                                   | 60               | 0.2                                   | 170 (2.1 V)                     | 40   |
| PFOTPh-TMA C8             | IrO <sub>2</sub>                                 | Pt/C                             | Water                                                   | 80               | 0.2                                   | 130                             | 5    |
| PFOTPh-TMA C10            | IrO <sub>2</sub>                                 | Pt/C                             | 1 M KOH                                                 | 80               | 0.2                                   | 150                             | 5    |
| Sustainion X37-50 Grade T | CCO-11                                           | Pt/C                             | 1 M KOH                                                 | 45               | 0.4                                   | 100                             | 23   |

## References:

- <sup>1</sup> X. Hu, Y. Huang, L. Liu, Q. Ju, X. Zhou, X. Qiao, Z. Zheng, N. Li, Piperidinium functionalized aryl ether-free polyaromatics as anion exchange membrane for water electrolyzers: Performance and durability, *J. Memb. Sci.* 621 (2021) 118964. <https://doi.org/10.1016/j.memsci.2020.118964>.
- <sup>2</sup> D. Henkensmeier, M. Najibah, C. Harms, J. Zitka, J. Hnat, K. Bouzek, Overview: State-of-the Art Commercial Membranes for Anion Exchange Membrane Water Electrolysis, *J. Electrochem. Energy Convers. Storage.* 18 (2021). <https://doi.org/10.1115/1.4047963>.
- <sup>3</sup> A. Carbone, S.C. Zignani, I. Gatto, S. Trocino, A.S. Arico, Assessment of the FAA3-50 polymer electrolyte in combination with a NiMn<sub>2</sub>O<sub>4</sub> anode catalyst for anion exchange membrane water electrolysis, *Int. J. Hydrogen Energy.* 45 (2020) 9285–9292. <https://doi.org/10.1016/j.ijhydene.2020.01.150>.
- <sup>4</sup> S. Vengatesan, S. Santhi, S. Jeevanantham, G. Sozhan, Quaternized poly (styrene-co-vinylbenzyl chloride) anion exchange membranes for alkaline water electrolyzers, *J. Power Sources.* 284 (2015) 361–368. <https://doi.org/10.1016/j.jpowsour.2015.02.118>.
- <sup>5</sup> R. Soni, S. Miyanishi, H. Kuroki, T. Yamaguchi, Pure Water Solid Alkaline Water Electrolyzer Using Fully Aromatic and High-Molecular-Weight Poly(fluorene- alt-tetrafluorophenylene)-trimethyl Ammonium Anion Exchange Membranes and Ionomers, *ACS Appl. Energy Mater.* 4 (2021) 1053–1058. <https://doi.org/10.1021/acsaem.0c01938>.
- <sup>6</sup> S. Miyanishi, T. Yamaguchi, Highly conductive mechanically robust high M-w polyfluorene anion exchange membrane for alkaline fuel cell and water electrolysis application, *Polym. Chem.* 11 (2020) 3812–3820. <https://doi.org/10.1039/d0py00334d>.
- <sup>7</sup> G. Huang, M. Mandal, N.U. Hassan, K. Groenhout, A. Dobbs, W.E. Mustain, P.A. Kohl, Ionomer Optimization for Water Uptake and Swelling in Anion Exchange Membrane Electrolyzer: Oxygen Evolution Electrode, *J. Electrochem. Soc.* 167 (2020) 164514. <https://doi.org/10.1149/1945-7111/abcde3>.
- <sup>8</sup> J.W. Xiao, A.M. Oliveira, L. Wang, Y. Zhao, T. Wang, J.H. Wang, B.P. Setzler, Y.S. Yan, Water-Fed Hydroxide Exchange Membrane Electrolyzer Enabled by a Fluoride-Incorporated Nickel-Iron Oxyhydroxide Oxygen Evolution Electrode, *ACS Catal.* 11 (2021) 264–270. <https://doi.org/10.1021/acscatal.0c04200>.
- <sup>9</sup> J. Wang, Y. Zhao, B.P. Setzler, S. Rojas-Carbonell, C. Ben Yehuda, A. Amel, M. Page, L. Wang, K. Hu, L. Shi, S. Gottesfeld, B. Xu, Y. Yan, Poly(aryl piperidinium) membranes and ionomers for hydroxide exchange membrane fuel cells, *Nat. Energy.* 4 (2019) 392–398. <https://doi.org/10.1038/s41560-019-0372-8>.

- <sup>10</sup> C.C. Pavel, F. Cecconi, C. Emiliani, S. Santuccioli, A. Scaffidi, S. Catanorchi, M. Comotti, Highly Efficient Platinum Group Metal Free Based Membrane-Electrode Assembly for Anion Exchange Membrane Water Electrolysis, *Angew. CHEMIE-INTERNATIONAL Ed.* 53 (2014) 1378–1381. <https://doi.org/10.1002/anie.201308099>.
- <sup>11</sup> W.T. Lu, Z.Z. Yang, H. Huang, F. Wei, W.H. Li, Y.H. Yu, Y.G. Gao, Y.H. Zhou, G. Zhang, Piperidinium-Functionalized Poly(Vinylbenzyl Chloride) Cross-linked by Polybenzimidazole as an Anion Exchange Membrane with a Continuous Ionic Transport Pathway, *Ind. Eng. Chem. Res.* 59 (2020) 21077–21087. <https://doi.org/10.1021/acs.iecr.0c04548>.
- <sup>12</sup> M. Bhushan, M. Mani, A.K. Singh, A.B. Panda, V.K. Shahi, Self-standing polyaniline membrane containing quaternary ammonium groups loaded with hollow spherical NiCo<sub>2</sub>O<sub>4</sub> electrocatalyst for alkaline water electrolyser, *J. Mater. Chem. A.* 8 (2020) 17089–17097. <https://doi.org/10.1039/d0ta05373b>.
- <sup>13</sup> A. Marinkas, I. Strużyńska-Piron, Y. Lee, A. Lim, H.S. Park, J.H. Jang, H.J. Kim, J. Kim, A. Maljusch, O. Conradi, D. Henkensmeier, Anion-conductive membranes based on 2-mesitylbenzimidazolium functionalised poly(2,6-dimethyl-1,4-phenylene oxide) and their use in alkaline water electrolysis, *Polymer (Guildf)*. 145 (2018) 242–251. <https://doi.org/10.1016/j.polymer.2018.05.008>.
- <sup>14</sup> H. Ito, N. Kawaguchi, S. Someya, T. Munakata, N. Miyazaki, M. Ishida, A. Nakano, Experimental investigation of electrolytic solution for anion exchange membrane water electrolysis, *Int. J. Hydrogen Energy.* 43 (2018) 17030–17039. <https://doi.org/10.1016/j.ijhydene.2018.07.143>.
- <sup>15</sup> P. Fortin, T. Khoza, X.Z. Cao, S.Y. Martinsen, A.O. Barnett, S. Holdcroft, High-performance alkaline water electrolysis using Aemion (TM) anion exchange membranes, *J. Power Sources.* 451 (2020) 227814. <https://doi.org/10.1016/j.jpowsour.2020.227814>.
- <sup>16</sup> J.J. Kaczur, H.Z. Yang, Z.C. Liu, S.A. Sajjad, R.I. Masel, Carbon Dioxide and Water Electrolysis Using New Alkaline Stable Anion Membranes, *Front. Chem.* 6 (2018). <https://doi.org/10.3389/fchem.2018.00263>.
- <sup>17</sup> A.K. Niaz, A. Akhtar, J.Y. Park, H.T. Lim, Effects of the operation mode on the degradation behavior of anion exchange membrane water electrolyzers, *J. Power Sources.* 481 (2021) 229093. <https://doi.org/10.1016/j.jpowsour.2020.229093>.
- <sup>18</sup> Z. Liu, S.D. Sajjad, Y. Gao, J. Kaczur, R. Masel, An Alkaline Water Electrolyzer with Sustainion™ Membranes: 1 A/cm<sup>2</sup> at 1.9V with Base Metal Catalysts, *ECS Trans.* 77 (2017) 71–73. <https://doi.org/10.1149/07709.0071ecst>.

- <sup>19</sup> Z. Liu, S.D. Sajjad, Y. Gao, H. Yang, J.J. Kaczur, R.I. Masel, The effect of membrane on an alkaline water electrolyzer, *Int. J. Hydrogen Energy*. 42 (2017) 29661–29665. <https://doi.org/10.1016/j.ijhydene.2017.10.050>.
- <sup>20</sup> P.Z. Chen, X.L. Hu, High-Efficiency Anion Exchange Membrane Water Electrolysis Employing Non-Noble Metal Catalysts, *Adv. Energy Mater.* 10 (2020) 2002285. <https://doi.org/10.1002/aenm.202002285>.
- <sup>21</sup> B. Motealleh, Z. Liu, R.I. Masel, J.P. Sculley, Z. Richard Ni, L. Meroueh, Next-generation anion exchange membrane water electrolyzers operating for commercially relevant lifetimes, *Int. J. Hydrogen Energy*. 46 (2021) 3379–3386. <https://doi.org/10.1016/j.ijhydene.2020.10.244>.
- <sup>22</sup> Y.S. Park, J. Yang, J. Lee, M.J. Jang, J. Jeong, W.S. Choi, Y. Kim, Y. Yin, M.H. Seo, Z. Chen, S.M. Choi, Superior performance of anion exchange membrane water electrolyzer: Ensemble of producing oxygen vacancies and controlling mass transfer resistance, *Appl. Catal. B Environ.* 278 (2020) 119276. <https://doi.org/10.1016/j.apcatb.2020.119276>.
- <sup>23</sup> M.J. Jang, J. Yang, J. Lee, Y.S. Park, J. Jeong, S.M. Park, J.Y. Jeong, Y. Yin, M.H. Seo, S.M. Choi, K.H. Lee, Superior performance and stability of anion exchange membrane water electrolysis: PH-controlled copper cobalt oxide nanoparticles for the oxygen evolution reaction, *J. Mater. Chem. A*. 8 (2020) 4290–4299. <https://doi.org/10.1039/c9ta13137j>.
- <sup>24</sup> L. Wang, X. Peng, W.E. Mustain, J.R. Varcoe, Radiation-grafted anion-exchange membranes: The switch from low- to high-density polyethylene leads to remarkably enhanced fuel cell performance, *Energy Environ. Sci.* 12 (2019) 1575–1579. <https://doi.org/10.1039/c9ee00331b>.
- <sup>25</sup> S. Adhikari, M.K. Pagels, J.Y. Jeon, C. Bae, Ionomers for electrochemical energy conversion & storage technologies, *Polymer*. 211 (2020) 123080. <https://doi.org/10.1016/j.polymer.2020.123080>.
- <sup>26</sup> L. Wang, M. Bellini, H.A. Miller, J.R. Varcoe, A high conductivity ultrathin anion-exchange membrane with 500+ h alkali stability for use in alkaline membrane fuel cells that can achieve 2 W cm<sup>-2</sup> at 80 °C, *J. Mater. Chem. A*. 6 (2018) 15404–15412. <https://doi.org/10.1039/c8ta04783a>.
- <sup>27</sup> A. Zhegur-Khais, F. Kubanek, U. Krewer, D.R. Dekel, Measuring the true hydroxide conductivity of anion exchange membranes, *J. Memb. Sci.* 612 (2020) 118461. <https://doi.org/10.1016/j.memsci.2020.118461>.
- <sup>28</sup> J.C. Douglin, J.R. Varcoe, D.R. Dekel, A high-temperature anion-exchange membrane fuel

- cell, *J. Power Sources Adv.* 5 (2020) 100023. <https://doi.org/10.1016/j.powera.2020.100023>.
- <sup>29</sup> J.C. Douglin, R.K. Singh, S. Haj, S. Li, J. Biemolt, N. Yan, J.R. Varcoe, G. Rothenberg, D. Dekel, A High-Temperature Anion-Exchange Membrane Fuel Cell with a Critical Raw Material-free Cathode, *Chem. Eng. J. Adv.* 8 (2021) 100153. <https://doi.org/10.1016/j.cej.2021.100153>.
- <sup>30</sup> J. Ponce-González, I. Ouachan, J.R. Varcoe, D.K. Whelligan, Radiation-induced grafting of a butyl-spacer styrenic monomer onto ETFE: The synthesis of the most alkali stable radiation-grafted anion-exchange membrane to date, *J. Mater. Chem. A.* 6 (2018) 823–827. <https://doi.org/10.1039/c7ta10222d>.
- <sup>31</sup> C. Xiao Lin, X. Qin Wang, E. Ning Hu, Q. Yang, Q. Gen Zhang, A. Mei Zhu, Q. Lin Liu, Quaternized triblock polymer anion exchange membranes with enhanced alkaline stability, *J. Memb. Sci.* 541 (2017) 358–366. <https://doi.org/10.1016/j.memsci.2017.07.032>.
- <sup>32</sup> J.Y. Jeon, S. Park, J. Han, S. Maurya, A.D. Mohanty, D. Tian, N. Saikia, M.A. Hickner, C.Y. Ryu, M.E. Tuckerman, S.J. Paddison, Y.S. Kim, C. Bae, Synthesis of Aromatic Anion Exchange Membranes by Friedel-Crafts Bromoalkylation and Cross-Linking of Polystyrene Block Copolymers, *Macromolecules.* 52 (2019) 2139–2147. <https://doi.org/10.1021/acs.macromol.8b02355>.
- <sup>33</sup> T.J. Clark, N.J. Robertson, H.A. Kostalik IV, E.B. Lobkovsky, P.F. Mutolo, H.D. Abruña, G.W. Coates, A ring-opening metathesis polymerization route to alkaline anion exchange membranes: Development of hydroxide-conducting thin films from an ammonium-functionalized monomer, *J. Am. Chem. Soc.* 131 (2009) 12888–12889. <https://doi.org/10.1021/ja905242r>.
- <sup>34</sup> S.C. Price, X. Ren, A.M. Savage, F.L. Beyer, Synthesis and characterization of anion-exchange membranes based on hydrogenated poly(norbornene), *Polym. Chem.* 8 (2017) 5708–5717. <https://doi.org/10.1039/c7py01084b>.
- <sup>35</sup> W. Chen, M. Mandal, G. Huang, X. Wu, G. He, P.A. Kohl, Highly Conducting Anion-Exchange Membranes Based on Cross-Linked Poly(norbornene): Ring Opening Metathesis Polymerization, *ACS Appl. Energy Mater.* 2 (2019) 2458–2468. <https://doi.org/10.1021/acsaem.8b02052>.
- <sup>36</sup> W. You, E. Padgett, S.N. MacMillan, D.A. Muller, G.W. Coates, Highly conductive and chemically stable alkaline anion exchange membranes via ROMP of trans-cyclooctene derivatives, *Proc. Natl. Acad. Sci. U. S. A.* 116 (2019) 9729–9734. <https://doi.org/10.1073/pnas.1900988116>.
- <sup>37</sup> M. Mandal, G. Huang, P.A. Kohl, Anionic multiblock copolymer membrane based on vinyl

- addition polymerization of norbornenes: Applications in anion-exchange membrane fuel cells, *J. Memb. Sci.* 570–571 (2019) 394–402.  
<https://doi.org/10.1016/j.memsci.2018.10.041>.
- <sup>38</sup> L. Zhu, X. Peng, S.L. Shang, M.T. Kwasny, T.J. Zimudzi, X. Yu, N. Saikia, J. Pan, Z.K. Liu, G.N. Tew, W.E. Mustain, M. Yandrasits, M.A. Hickner, High Performance Anion Exchange Membrane Fuel Cells Enabled by Fluoropoly(olefin) Membranes, *Adv. Funct. Mater.* 29 (2019). <https://doi.org/10.1002/adfm.201902059>.
- <sup>39</sup> M.R. Hibbs, Alkaline stability of poly(phenylene)-based anion exchange membranes with various cations, *J. Polym. Sci. Part B Polym. Phys.* 51 (2013) 1736–1742.  
<https://doi.org/10.1002/polb.23149>.
- <sup>40</sup> D. Li, E.J. Park, W. Zhu, Q. Shi, Y. Zhou, H. Tian, Y. Lin, A. Serov, B. Zulevi, E.D. Baca, C. Fujimoto, H.T. Chung, Y.S. Kim, Highly quaternized polystyrene ionomers for high performance anion exchange membrane water electrolyzers, *Nat. Energy.* 5 (2020) 378–385.  
<https://doi.org/10.1038/s41560-020-0577-x>.
- <sup>41</sup> H. Ono, J. Miyake, S. Shimada, M. Uchida, K. Miyatake, Anion exchange membranes composed of perfluoroalkylene chains and ammonium-functionalized oligophenylenes, *J. Mater. Chem. A* 3 (2015) 21779–21788. <https://doi.org/10.1039/c5ta06454f>.
- <sup>42</sup> R. Akiyama, N. Yokota, K. Miyatake, Chemically Stable, Highly Anion Conductive Polymers Composed of Quinquephenylene and Pendant Ammonium Groups, *Macromolecules.* 52 (2019) 2131–2138. <https://doi.org/10.1021/acs.macromol.8b02199>.
- <sup>43</sup> J. Fan, S. Willdorf-Cohen, E.M. Schibli, Z. Paula, W. Li, T.J.G. Skalski, A.T. Sergeenko, A. Hohenadel, B.J. Frisken, E. Magliocca, W.E. Mustain, C.E. Diesendruck, D.R. Dekel, S. Holdcroft, Poly(bis-arylimidazoliums) possessing high hydroxide ion exchange capacity and high alkaline stability, *Nat. Commun.* 10 (2019) 2306. <https://doi.org/10.1038/s41467-019-10292-z>.
- <sup>44</sup> S. Noh, J.Y. Jeon, S. Adhikari, Y.S. Kim, C. Bae, Molecular Engineering of Hydroxide Conducting Polymers for Anion Exchange Membranes in Electrochemical Energy Conversion Technology, *Acc. Chem. Res.* 52 (2019) 2745–2755.  
<https://doi.org/10.1021/acs.accounts.9b00355>.
- <sup>45</sup> W.-H. Lee, E.J. Park, J. Han, D.W. Shin, Y.S. Kim, C. Bae, Poly(terphenylene) Anion Exchange Membranes: The Effect of Backbone Structure on Morphology and Membrane Property, *ACS Macro Lett.* 6 (2017) 566–570.  
<https://doi.org/10.1021/acsmacrolett.7b00148>.
- <sup>46</sup> J.S. Olsson, T.H. Pham, P. Jannasch, Poly(arylene piperidinium) Hydroxide Ion Exchange



- Membranes: Synthesis, Alkaline Stability, and Conductivity, *Adv. Funct. Mater.* 28 (2018) 1702758. <https://doi.org/10.1002/adfm.201702758>.
- <sup>47</sup> H. Li, M.R. Kraglund, A.K. Reumert, X. Ren, D. Aili, J. Yang, Poly(vinyl benzyl methylpyrrolidinium) hydroxide derived anion exchange membranes for water electrolysis, *J. Mater. Chem. A* 7 (2019) 17914–17922. <https://doi.org/10.1039/c9ta04868e>.
- <sup>48</sup> J. Parrondo, C.G. Arges, M. Niedzwiecki, E.B. Anderson, K.E. Ayers, V. Ramani, Degradation of anion exchange membranes used for hydrogen production by ultrapure water electrolysis., *RSC Adv.* 4 (2014) 9875–9879. <https://doi.org/10.1039/c3ra46630b>.
- <sup>49</sup> C.G. Arges, J. Parrondo, G. Johnson, A. Nadhan, V. Ramani, Assessing the influence of different cation chemistries on ionic conductivity and alkaline stability of anion exchange membranes, *J. Mater. Chem.* 22 (2012) 3733. <https://doi.org/10.1039/c2jm14898f>.
- <sup>50</sup> J. Pan, Y. Li, L. Zhuang, J. Lu, Self-crosslinked alkaline polymer electrolyte exceptionally stable at 90 °C, *Chem. Commun.* 46 (2010) 8597–8599. <https://doi.org/10.1039/c0cc03618h>.
- <sup>51</sup> J. Pan, C. Chen, L. Zhuang, J. Lu, Designing Advanced Alkaline Polymer Electrolytes for Fuel Cell Applications, *Acc. Chem. Res.* 45 (2012) 473–481.
- <sup>52</sup> L. Xiao, S. Zhang, J. Pan, C. Yang, M. He, L. Zhuang, J. Lu, First implementation of alkaline polymer electrolyte water electrolysis working only with pure water, *Energy Environ. Sci.* 5 (2012) 7869–7871. <https://doi.org/10.1039/c2ee22146b>.
- <sup>53</sup> A. Lim, H. juhn Kim, D. Henkensmeier, S. Jong Yoo, J. Young Kim, S. Young Lee, Y.E. Sung, J.H. Jang, H.S. Park, A study on electrode fabrication and operation variables affecting the performance of anion exchange membrane water electrolysis, *J. Ind. Eng. Chem.* 76 (2019) 410–418. <https://doi.org/10.1016/j.jiec.2019.04.007>.
- <sup>54</sup> J. Hnát, M. Plevová, J. Žitka, M. Paidar, K. Bouzek, Anion-selective materials with 1,4-diazabicyclo[2.2.2]octane functional groups for advanced alkaline water electrolysis, *Electrochim. Acta.* 248 (2017) 547–555. <https://doi.org/10.1016/j.electacta.2017.07.165>.
- <sup>55</sup> N. Lee, D.T. Duong, D. Kim, Cyclic ammonium grafted poly (arylene ether ketone) hydroxide ion exchange membranes for alkaline water electrolysis with high chemical stability and cell efficiency, *Electrochim. Acta.* 271 (2018) 150–157. <https://doi.org/10.1016/j.electacta.2018.03.117>.
- <sup>56</sup> X. Wu, K. Scott, A Li-doped Co<sub>3</sub>O<sub>4</sub> oxygen evolution catalyst for non-precious metal alkaline anion exchange membrane water electrolyzers, *Int. J. Hydrogen Energy.* 38 (2013) 3123–3129. <https://doi.org/10.1016/j.ijhydene.2012.12.087>.

- <sup>57</sup> X. Wu, K. Scott, A polymethacrylate-based quaternary ammonium OH<sup>-</sup> ionomer binder for non-precious metal alkaline anion exchange membrane water electrolyzers, *J. Power Sources*. 214 (2012) 124–129. <https://doi.org/10.1016/j.jpowsour.2012.03.069>.
- <sup>58</sup> M. Faraj, M. Boccia, H. Miller, F. Martini, S. Borsacchi, M. Geppi, A. Pucci, New LDPE based anion-exchange membranes for alkaline solid polymeric electrolyte water electrolysis, *Int. J. Hydrogen Energy*. 37 (2012) 14992–15002. <https://doi.org/10.1016/j.ijhydene.2012.08.012>.
- <sup>59</sup> X.D. Su, L. Gao, L. Hu, N.A. Qaisrani, X.M. Yan, W.J. Zhang, X.B. Jiang, X.H. Ruan, G.H. He, Novel piperidinium functionalized anionic membrane for alkaline polymer electrolysis with excellent electrochemical properties, *J. Memb. Sci.* 581 (2019) 283–292. <https://doi.org/10.1016/j.memsci.2019.03.072>.
- <sup>60</sup> N. Chen, C. Lu, Y. Li, C. Long, H. Zhu, Robust poly(aryl piperidinium)/N-spirocyclic poly(2,6-dimethyl-1,4-phenyl) for hydroxide-exchange membranes, *J. Memb. Sci.* 572 (2019) 246–254. <https://doi.org/10.1016/j.memsci.2018.10.067>.
- <sup>61</sup> I. Vincent, A. Kruger, D. Bessarabov, Hydrogen Production by water Electrolysis with an Ultrathin Anion-exchange membrane (AEM), *Int. J. Electrochem. Sci.* 13 (2018) 11347–11358. <https://doi.org/10.20964/2018.12.84>.
- <sup>62</sup> I. Vincent, A. Kruger, D. Bessarabov, Development of efficient membrane electrode assembly for low cost hydrogen production by anion exchange membrane electrolysis, *Int. J. Hydrogen Energy*. 42 (2017) 10752–10761. <https://doi.org/10.1016/j.ijhydene.2017.03.069>.
- <sup>63</sup> G. Gupta, K. Scott, M. Mamlouk, Performance of polyethylene based radiation grafted anion exchange membrane with polystyrene-*b*-poly (ethylene/butylene)-*b*-polystyrene based ionomer using NiCo<sub>2</sub>O<sub>4</sub> catalyst for water electrolysis, *J. Power Sources*. 375 (2018) 387–396. <https://doi.org/10.1016/j.jpowsour.2017.07.026>.
- <sup>64</sup> X. Wu, K. Scott, F. Xie, N. Alford, A reversible water electrolyser with porous PTFE based OH<sup>-</sup> conductive membrane as energy storage cells, *J. Power Sources*. 246 (2014) 225–231. <https://doi.org/10.1016/j.jpowsour.2013.07.081>.
- <sup>65</sup> Y.C. Cao, X. Wu, K. Scott, A quaternary ammonium grafted poly vinyl benzyl chloride membrane for alkaline anion exchange membrane water electrolyzers with no-noble-metal catalysts, *Int. J. Hydrogen Energy*. 37 (2012) 9524–9528. <https://doi.org/10.1016/j.ijhydene.2012.03.116>.
- <sup>66</sup> Y.C. Cao, X. Wang, M. Mamlouk, K. Scott, Preparation of alkaline anion exchange polymer membrane from methylated melamine grafted poly(vinylbenzyl chloride) and its fuel cell

- performance, *J. Mater. Chem.* 21 (2011) 12910–12916. <https://doi.org/10.1039/c1jm12068a>.
- <sup>67</sup> E.J. Park, C.B. Capuano, K.E. Ayers, C. Bae, Chemically durable polymer electrolytes for solid-state alkaline water electrolysis, *J. Power Sources.* 375 (2018) 367–372. <https://doi.org/10.1016/j.jpowsour.2017.07.090>.
- <sup>68</sup> M.S. Cha, J.E. Park, S. Kim, S.-H. Han, S.-H. Shin, S.H. Yang, T.-H. Kim, D.M. Yu, S. So, Y.T. Hong, S.J. Yoon, S.-G. Oh, S.Y. Kang, O.-H. Kim, H.S. Park, B. Bae, Y.-E. Sung, Y.-H. Cho, J.Y. Lee, Poly(carbazole)-based anion-conducting materials with high performance and durability for energy conversion devices, *Energy Environ. Sci.* 13 (2020) 3633–3645. <https://doi.org/10.1039/d0ee01842b>.
- <sup>69</sup> H. Li, N. Yu, F. Gellrich, A.K. Reumert, M.R. Kraglund, J. Dong, D. Aili, J. Yang, Diamine crosslinked anion exchange membranes based on poly(vinyl benzyl methylpyrrolidinium) for alkaline water electrolysis, *J. Memb. Sci.* 633 (2021). <https://doi.org/10.1016/j.memsci.2021.119418>.
- <sup>70</sup> D. Aili, A.G. Wright, M.R. Kraglund, K. Jankova, S. Holdcroft, J.O. Jensen, Towards a stable ion-solvating polymer electrolyte for advanced alkaline water electrolysis, *J. Mater. Chem. A.* 5 (2017) 5055–5066. <https://doi.org/10.1039/c6ta10680c>.
- <sup>71</sup> C.G. Arges, L. Wang, J. Parrondo, V. Ramani, Best Practices for Investigating Anion Exchange Membrane Suitability for Alkaline Electrochemical Devices: Case Study Using Quaternary Ammonium Poly(2,6-dimethyl 1,4-phenylene)oxide Anion Exchange Membranes, *J. Electrochem. Soc.* 160 (2013) F1258–F1274. <https://doi.org/10.1149/2.049311jes>.
- <sup>72</sup> J. Parrondo, V. Ramani, Stability of Poly(2,6-dimethyl 1,4-phenylene)Oxide-Based Anion Exchange Membrane Separator and Solubilized Electrode Binder in Solid-State Alkaline Water Electrolyzers, *J. Electrochem. Soc.* 161 (2014) F1015–F1020. <https://doi.org/10.1149/2.0601410jes>.
- <sup>73</sup> H.J. Park, S.Y. Lee, T.K. Lee, H.-J. Kim, Y.M. Lee, N3-butyl imidazolium-based anion exchange membranes blended with Poly(vinyl alcohol) for alkaline water electrolysis, *J. Memb. Sci.* 611 (2020) 118355. <https://doi.org/10.1016/j.memsci.2020.118355>.
- <sup>74</sup> X.M. Yan, X. Yang, X.D. Su, L. Gao, J. Zhao, L. Hu, M.T. Di, T.T. Li, X.H. Ruan, G.H. He, Twisted ether-free polymer based alkaline membrane for high-performance water electrolysis, *J. Power Sources.* 480 (2020) 228805. <https://doi.org/10.1016/j.jpowsour.2020.228805>.
- <sup>75</sup> X.M. Chu, Y. Shi, L. Liu, Y.D. Huang, N.W. Li, Piperidinium-functionalized anion exchange membranes and their application in alkaline fuel cells and water electrolysis, *J.*

- Mater. Chem. A. 7 (2019) 7717–7727. <https://doi.org/10.1039/c9ta01167f>.
- <sup>76</sup> D. Aili, M.R. Kraglund, J. Tavecchi, C. Chatzichristodoulou, J.O. Jensen, Polysulfone-polyvinylpyrrolidone blend membranes as electrolytes in alkaline water electrolysis, *J. Memb. Sci.* 598 (2020) 117674. <https://doi.org/10.1016/j.memsci.2019.117674>.
- <sup>77</sup> R.E. Coppola, D. Herranz, R. Escudero-Cid, N. Ming, N.B. D’Accorso, P. Ocon, G.C. Abuin, Polybenzimidazole-crosslinked-poly(vinyl benzyl chloride) as anion exchange membrane for alkaline electrolyzers, *Renew. Energy.* 157 (2020) 71–82. <https://doi.org/10.1016/j.renene.2020.04.140>.
- <sup>78</sup> R.E. Coppola, F.N. Molinari, N.B. D’Accorso, G.C. Abuin, Polyvinyl alcohol nanofibers reinforced with polybenzimidazole: Facile preparation and properties of an anion exchange membrane, *Polym. Adv. Technol.* 32 (2021) 3505–3514. <https://doi.org/10.1002/pat.5361>.
- <sup>79</sup> H. Ono, T. Kimura, A. Takano, K. Asazawa, J. Miyake, J. Inukai, K. Miyatake, Robust anion conductive polymers containing perfluoroalkylene and pendant ammonium groups for high performance fuel cells, *J. Mater. Chem. A.* 5 (2017) 24804–24812. <https://doi.org/10.1039/c7ta09409d>.
- <sup>80</sup> S. Maurya, C.H. Fujimoto, M.R. Hibbs, C. Narvaez Villarrubia, Y.S. Kim, Toward Improved Alkaline Membrane Fuel Cell Performance Using Quaternized Aryl-Ether Free Polyaromatics, *Chem. Mater.* 30 (2018) 2188–2192. <https://doi.org/10.1021/acs.chemmater.8b00358>.
- <sup>81</sup> S. Miyanishi, T. Yamaguchi, Highly durable spirobifluorene-based aromatic anion conducting polymer for a solid ionomer of alkaline fuel cells and water electrolysis cells, *J. Mater. Chem. A.* 7 (2019) 2219–2224. <https://doi.org/10.1039/c8ta08400a>.
- <sup>82</sup> Y.K. Choe, C. Fujimoto, K.S. Lee, L.T. Dalton, K. Ayers, N.J. Henson, Y.S. Kim, Alkaline stability of benzyl trimethyl ammonium functionalized polyaromatics: A computational and experimental study, *Chem. Mater.* 26 (2014) 5675–5682. <https://doi.org/10.1021/cm502422h>.
- <sup>83</sup> D. Aili, M.K. Hansen, R.F. Renzaho, Q.F. Li, E. Christensen, J.O. Jensen, N.J. Bjerrum, Heterogeneous anion conducting membranes based on linear and crosslinked KOH doped polybenzimidazole for alkaline water electrolysis, *J. Memb. Sci.* 447 (2013) 424–432. <https://doi.org/10.1016/j.memsci.2013.07.054>.
- <sup>84</sup> L.A. Diaz, J. Hnát, N. Heredia, M.M. Bruno, F.A. Viva, M. Paidar, H.R. Corti, K. Bouzek, G.C. Abuin, Alkali doped poly (2,5-benzimidazole) membrane for alkaline water electrolysis: Characterization and performance, *J. Power Sources.* 312 (2016) 128–136. <https://doi.org/10.1016/j.jpowsour.2016.02.032>.

- <sup>85</sup> Y. Yang, T. Jiang, L. Li, S. Zhou, H. Fang, X. Li, H. Wei, Y. Ding, Chemo-stable poly(quinquephenylene-co-diphenylene piperidinium) ionomers for anion exchange membrane fuel cells, *J. Power Sources*. 506 (2021) 230184. <https://doi.org/10.1016/j.jpowsour.2021.230184>.
- <sup>86</sup> L. Li, J. Wang, M. Hussain, L. Ma, N.A. Qaisrani, S. Ma, L. Bai, X. Yan, X. Deng, G. He, F. Zhang, Side-chain manipulation of poly (phenylene oxide) based anion exchange membrane: Alkoxy extender integrated with flexible spacer, *J. Memb. Sci.* 624 (2021) 119088. <https://doi.org/10.1016/j.memsci.2021.119088>.
- <sup>87</sup> N. Chen, H.H. Wang, S.P. Kim, H.M. Kim, W.H. Lee, C. Hu, J.Y. Bae, E.S. Sim, Y.C. Chung, J.H. Jang, S.J. Yoo, Y. Zhuang, Y.M. Lee, Poly(fluorenyl aryl piperidinium) membranes and ionomers for anion exchange membrane fuel cells, *Nat. Commun.* 12 (2021) 2367. <https://doi.org/10.1038/s41467-021-22612-3>.
- <sup>88</sup> C. Long, Z. Wang, H. Zhu, High chemical stability anion exchange membrane based on poly(aryl piperidinium): Effect of monomer configuration on membrane properties, *Int. J. Hydrogen Energy*. 46 (2021) 18524–18533. <https://doi.org/10.1016/j.ijhydene.2021.02.209>.
- <sup>89</sup> J. Zhang, K. Zhang, X. Liang, W. Yu, X. Ge, M.A. Shehzad, Z. Ge, Z. Yang, L. Wu, T. Xu, Self-aggregating cationic-chains enable alkaline stable ion-conducting channels for anion-exchange membrane fuel cells, *J. Mater. Chem. A*. 9 (2021) 327–337. <https://doi.org/10.1039/d0ta11011f>.
- <sup>90</sup> X. Qiao, X. Wang, S. Liu, Y. Shen, N. Li, The alkaline stability and fuel cell performance of poly(N-spirocyclic quaternary ammonium) ionenes as anion exchange membrane, *J. Memb. Sci.* 630 (2021) 119325. <https://doi.org/10.1016/j.memsci.2021.119325>.
- <sup>91</sup> K. Firouz Tadavani, A. Abdolmaleki, M.R. Molavian, M. Zhiani, New Strategy Based on Click Reaction for Preparation of Cross-Linked Poly(Benzimidazolium-Imide) as an Anion-Exchange Membrane with Improved Alkaline Stability, *Ind. Eng. Chem. Res.* 60 (2021) 7097–7110. <https://doi.org/10.1021/acs.iecr.1c00071>.
- <sup>92</sup> Y. Yuan, T. Zhang, Z. Wang, Preparation of an Anion Exchange Membrane by Pyridine-Functionalized Polyether Ether Ketone to Improve Alkali Resistance Stability for an Alkali Fuel Cell, *Energy and Fuels*. 35 (2021) 3360–3367. <https://doi.org/10.1021/acs.energyfuels.0c03428>.
- <sup>93</sup> Y. Lu, L. Liu, Y. Pu, Y. Liu, N. Li, Z. Hu, S. Chen, Towards performance improved anion exchange membrane: Cross-linking with multi-cations oligomer modified graphene oxide, *Int. J. Hydrogen Energy*. 46 (2021) 23855–23867. <https://doi.org/10.1016/j.ijhydene.2021.04.167>.

- <sup>94</sup> D. Liu, L. Lin, Y. Xie, J. Pang, Z. Jiang, Anion exchange membrane based on poly(arylene ether ketone) containing long alkyl densely quaternized carbazole derivative pendant, *J. Memb. Sci.* 623 (2021) 119079. <https://doi.org/10.1016/j.memsci.2021.119079>.
- <sup>95</sup> F. Wang, Y. Li, C.H. Li, H. Zhu, Preparation and study of spirocyclic cationic side chain functionalized polybiphenyl piperidine anion exchange membrane, *J. Memb. Sci.* 620 (2021) 118919. <https://doi.org/10.1016/j.memsci.2020.118919>.
- <sup>96</sup> Y. Xiao, M. Zhang, D. Dong, Z. Yang, Y. Cao, K. Wang, M. Fan, Preparation of Branch Polyethyleneimine (BPEI) Crosslinked Anion Exchange Membrane Based on Poly(styrene-*b*-(ethylene-co-butylene)-*b*-styrene) (SEBS), *Macromol. Mater. Eng.* 306 (2021) 2000693. <https://doi.org/10.1002/mame.202000693>.
- <sup>97</sup> M. Kumari, J.C. Douglin, D.R. Dekel, Crosslinked quaternary phosphonium-functionalized poly(ether ether ketone) polymer-based anion-exchange membranes, *J. Memb. Sci.* 626 (2021) 119167. <https://doi.org/10.1016/j.memsci.2021.119167>.
- <sup>98</sup> M.I. Khan, X. Li, J. Fernandez-Garcia, M.H. Lashari, A. Ur Rehman, N. Elboughdiri, L. Kolsi, D. Ghernaout, Effect of Different Quaternary Ammonium Groups on the Hydroxide Conductivity and Stability of Anion Exchange Membranes, *ACS Omega.* 6 (2021) 7994–8001. <https://doi.org/10.1021/acsomega.0c05134>.
- <sup>99</sup> L. Bai, L. Ma, L. Li, A. Zhang, X. Yan, F. Zhang, G. He, Branched, Side-Chain Grafted Polyarylpiperidine Anion Exchange Membranes for Fuel Cell Application, *ACS Appl. Energy Mater.* 4 (2021) 6957–6967. <https://doi.org/10.1021/acsaem.1c01037>.
- <sup>100</sup> X. Wang, C. Lin, Y. Gao, R.G.H. Lammertink, Anion exchange membranes with twisted poly(terphenylene) backbone: Effect of the N-cyclic cations, *J. Memb. Sci.* 635 (2021) 119525. <https://doi.org/10.1016/j.memsci.2021.119525>.
- <sup>101</sup> N.C. Buggy, Y.F. Du, M.C. Kuo, K.A. Ahrens, J.S. Wilkinson, S. Seifert, E.B. Coughlin, A.M. Herring, A Polyethylene-Based Triblock Copolymer Anion Exchange Membrane with High Conductivity and Practical Mechanical Properties, *ACS Appl. Polym. Mater.* 2 (2020) 1294–1303. <https://doi.org/10.1021/acsaem.9b01182>.
- <sup>102</sup> H.J. Park, X. Chu, S.P. Kim, D. Choi, J.W. Jung, J. Woo, S.Y. Baek, S.J. Yoo, Y.C. Chung, J.G. Seong, S.Y. Lee, N. Li, Y.M. Lee, Effect of N-cyclic cationic groups in poly(phenylene oxide)-based catalyst ionomer membranes for anion exchange membrane fuel cells, *J. Memb. Sci.* 608 (2020) 118183. <https://doi.org/10.1016/j.memsci.2020.118183>.
- <sup>103</sup> Y. Wang, D. Zhang, X. Liang, M.A. Shehzad, X. Xiao, Y. Zhu, X. Ge, J. Zhang, Z. Ge, L. Wu, T. Xu, Improving fuel cell performance of an anion exchange membrane by terminal

- pending bis-cations on a flexible side chain, *J. Memb. Sci.* 595 (2020) 117483. <https://doi.org/10.1016/j.memsci.2019.117483>.
- <sup>104</sup> C. Cheng, X. He, S. Huang, F. Zhang, Y. Guo, Y. Wen, B. Wu, D. Chen, Novel self-cross-linked multi-imidazolium cations long flexible side chains triblock copolymer anion exchange membrane based on ROMP-type polybenzoxorbornadiene, *Int. J. Hydrogen Energy.* 45 (2020) 19676–19690. <https://doi.org/10.1016/j.ijhydene.2020.04.276>.
- <sup>105</sup> Z. Liu, X. Li, K. Shen, P. Feng, Y. Zhang, X. Xu, W. Hu, Z. Jiang, B. Liu, M.D. Guiver, Naphthalene-based poly(arylene ether ketone) anion exchange membranes, *J. Mater. Chem. A.* 1 (2013) 6481–6488. <https://doi.org/10.1039/c3ta10355b>.
- <sup>106</sup> A. Ouadah, H. Xu, T. Luo, S. Gao, Z. Zhang, Z. Li, C. Zhu, Synthesis of novel copolymers based on: P -methylstyrene, N, N -butylvinylimidazolium and polybenzimidazole as highly conductive anion exchange membranes for fuel cell application, *RSC Adv.* 7 (2017) 47806–47817. <https://doi.org/10.1039/c7ra06394f>.
- <sup>107</sup> J.Y. Chu, K.H. Lee, A.R. Kim, D.J. Yoo, Improved electrochemical performance of composite anion exchange membranes for fuel cells through cross linking of the polymer chain with functionalized graphene oxide, *J. Memb. Sci.* 611 (2020) 118385. <https://doi.org/10.1016/j.memsci.2020.118385>.
- <sup>108</sup> T.H. Pham, A. Allushi, J.S. Olsson, P. Jannasch, Rational molecular design of anion exchange membranes functionalized with alicyclic quaternary ammonium cations, *Polym. Chem.* 11 (2020) 6953–6963. <https://doi.org/10.1039/d0py01291b>.
- <sup>109</sup> S.H. Kim, K.H. Lee, J.Y. Chu, A.R. Kim, D.J. Yoo, Enhanced hydroxide conductivity and dimensional stability with blended membranes containing hyperbranched pae/linear ppo as anion exchange membranes, *Polymers (Basel).* 12 (2020) 3011. <https://doi.org/10.3390/polym12123011>.
- <sup>110</sup> B.H. Oh, A.R. Kim, D.J. Yoo, Profile of extended chemical stability and mechanical integrity and high hydroxide ion conductivity of poly(ether imide) based membranes for anion exchange membrane fuel cells, *Int. J. Hydrogen Energy.* 44 (2019) 4281–4292. <https://doi.org/10.1016/j.ijhydene.2018.12.177>.
- <sup>111</sup> Y. Li, J. Zhang, H. Yang, S. Yang, S. Lu, H. Wei, Y. Ding, Boosting the performance of an anion exchange membrane by the formation of well-connected ion conducting channels, *Polym. Chem.* 10 (2019) 2822–2831. <https://doi.org/10.1039/c9py00011a>.
- <sup>112</sup> J.Y. Chu, K.H. Lee, A.R. Kim, D.J. Yoo, Graphene-mediated organic-inorganic composites with improved hydroxide conductivity and outstanding alkaline stability for anion exchange membranes, *Compos. Part B Eng.* 164 (2019) 324–332.

<https://doi.org/10.1016/j.compositesb.2018.11.084>.

- <sup>113</sup> Y. Lu, X. Pan, N. Li, Z. Hu, S. Chen, Improved performance of quaternized poly(arylene ether ketone)s/graphitic carbon nitride nanosheets composite anion exchange membrane for fuel cell applications, *Appl. Surf. Sci.* 503 (2020) 144071. <https://doi.org/10.1016/j.apsusc.2019.144071>.
- <sup>114</sup> M. Mandal, G. Huang, N.U. Hassan, X. Peng, T. Gu, A.H. Brooks-Starks, B. Bahar, W.E. Mustain, P.A. Kohl, The Importance of Water Transport in High Conductivity and High-Power Alkaline Fuel Cells, *J. Electrochem. Soc.* 167 (2020) 054501. <https://doi.org/10.1149/2.0022005jes>.
- <sup>115</sup> H.S. Dang, P. Jannasch, High-Performing Hydroxide Exchange Membranes with Flexible Tetra-Piperidinium Side Chains Linked by Alkyl Spacers, *ACS Appl. Energy Mater.* 1 (2018) 2222–2231. <https://doi.org/10.1021/acsaem.8b00294>.
- <sup>116</sup> A.M.A. Mahmoud, A.M.M. Elsaghier, K. Otsuji, K. Miyatake, High Hydroxide Ion Conductivity with Enhanced Alkaline Stability of Partially Fluorinated and Quaternized Aromatic Copolymers as Anion Exchange Membranes, *Macromolecules.* 50 (2017) 4256–4266. <https://doi.org/10.1021/acs.macromol.7b00401>.
- <sup>117</sup> N. Chen, C. Lu, Y. Li, C. Long, Z. Li, H. Zhu, Tunable multi-cations-crosslinked poly(arylene piperidinium)-based alkaline membranes with high ion conductivity and durability, *J. Memb. Sci.* 588 (2019) 117120. <https://doi.org/10.1016/j.memsci.2019.05.044>.
- <sup>118</sup> C. Shang, Z. Wang, L. Wang, J. Wang, Preparation and characterization of a polyvinyl alcohol grafted bis-crown ether anion exchange membrane with high conductivity and strong alkali stability, *Int. J. Hydrogen Energy.* 45 (2020) 16738–16750. <https://doi.org/10.1016/j.ijhydene.2020.04.134>.
- <sup>119</sup> H.A.K. Iv, T.J. Clark, N.J. Robertson, P.F. Mutolo, J.M. Longo, G.W. Coates, Solvent Processable Tetraalkylammonium-Functionalized Polyethylene for Use as an Alkaline Anion Exchange Membrane, 43 (2010) 7147–7150. <https://doi.org/10.1021/ma101172a>.
- <sup>120</sup> Y. Liu, J. Wang, Y. Yang, T.M. Brenner, S. Seifert, Y. Yan, M.W. Liberatore, A.M. Herring, Anion transport in a chemically stable, sterically bulky  $\alpha$ -C modified imidazolium functionalized anion exchange membrane, *J. Phys. Chem. C.* 118 (2014) 15136–15145. <https://doi.org/10.1021/jp5027674>.
- <sup>121</sup> K. Firouz Tadavani, A. Abdolmaleki, M.R. Molavian, M. Zhiani, New Strategy Based on Click Reaction for Preparation of Cross-Linked Poly(Benzimidazolium-Imide) as an Anion-Exchange Membrane with Improved Alkaline Stability, *Ind. Eng. Chem. Res.* 60 (2021) 7097–7110. <https://doi.org/10.1021/acs.iecr.1c00071>.



- <sup>122</sup> S. Willdorf-Cohen, A.N. Mondal, D.R. Dekel, C.E. Diesendruck, Chemical stability of poly(phenylene oxide)-based ionomers in an anion exchange-membrane fuel cell environment, *J. Mater. Chem. A*. 6 (2018) 22234–22239. <https://doi.org/10.1039/C8TA05785K>.
- <sup>123</sup> L. Wang, J.J. Brink, Y. Liu, A.M. Herring, J. Ponce-González, D.K. Whelligan, J.R. Varcoe, Non-fluorinated pre-irradiation-grafted (peroxidated) LDPE-based anion-exchange membranes with high performance and stability, *Energy Environ. Sci.* 10 (2017) 2154–2167. <https://doi.org/10.1039/c7ee02053h>.
- <sup>124</sup> X. Wu, K. Scott,  $\text{Cu}_x\text{Co}_{3-x}\text{O}_4$  ( $0 \leq x < 1$ ) nanoparticles for oxygen evolution in high performance alkaline exchange membrane water electrolyzers, *J. Mater. Chem.* 21 (2011) 12344–12351. <https://doi.org/10.1039/c1jm11312g>.
- <sup>125</sup> S.H. Ahn, B.S. Lee, I. Choi, S.J. Yoo, H.J. Kim, E.A. Cho, D. Henkensmeier, S.W. Nam, S.K. Kim, J.H. Jang, Development of a membrane electrode assembly for alkaline water electrolysis by direct electrodeposition of nickel on carbon papers, *Appl. Catal. B Environ.* 154–155 (2014) 197–205. <https://doi.org/10.1016/j.apcatb.2014.02.021>.
- <sup>126</sup> I. V Pushkareva, A.S. Pushkarev, S.A. Grigoriev, P. Modisha, D.G. Bessarabov, Comparative study of anion exchange membranes for low-cost water electrolysis, *Int. J. Hydrogen Energy*. 45 (2020) 26070–26079. <https://doi.org/10.1016/j.ijhydene.2019.11.011>.
- <sup>127</sup> Y.X. Chen, A. Lavacchi, H.A. Miller, M. Bevilacqua, J. Filippi, M. Innocenti, A. Marchionni, W. Oberhauser, L. Wang, F. Vizza, Nanotechnology makes biomass electrolysis more energy efficient than water electrolysis, *Nat. Commun.* 5 (2014) 4036. <https://doi.org/10.1038/ncomms5036>.
- <sup>128</sup> L. Wang, T. Weissbach, R. Reissner, A. Ansar, A.S. Gago, S. Holdcroft, K.A. Friedrich, High Performance Anion Exchange Membrane Electrolysis Using Plasma-Sprayed, Non-Precious-Metal Electrodes, *ACS Appl. Energy Mater.* 2 (2019) 7903–7912. <https://doi.org/10.1021/acsaem.9b01392>.
- <sup>129</sup> X. Hu, Y.D. Huang, L. Liu, Q. Ju, X.X. Zhou, X.Q. Qiao, Z.F. Zheng, N.W. Li, Piperidinium functionalized aryl ether-free polyaromatics as anion exchange membrane for water electrolyzers: Performance and durability, *J. Memb. Sci.* 621 (2021) 118964. <https://doi.org/10.1016/j.memsci.2020.118964>.
- <sup>130</sup> M.R. Kraglund, M. Carmo, G. Schiller, S.A. Ansar, D. Aili, E. Christensen, J.O. Jensen, Ion-solvating membranes as a new approach towards high rate alkaline electrolyzers, *Energy Environ. Sci.* 12 (2019) 3313–3318. <https://doi.org/10.1039/c9ee00832b>.

- <sup>131</sup> A.Y. Faid, A.O. Barnett, F. Seland, S. Sunde, Highly Active Nickel-Based Catalyst for Hydrogen Evolution in Anion Exchange Membrane Electrolysis, *Catalysts*. 8 (2018). <https://doi.org/10.3390/catal8120614>.
- <sup>132</sup> L. Zeng, T.S. Zhao, Integrated inorganic membrane electrode assembly with layered double hydroxides as ionic conductors for anion exchange membrane water electrolysis, *Nano Energy*. 11 (2015) 110–118. <https://doi.org/10.1016/j.nanoen.2014.10.019>.
- <sup>133</sup> M.K. Cho, H.Y. Park, H.J. Lee, H.J. Kim, A. Lim, D. Henkensmeier, S.J. Yoo, J.Y. Kim, S.Y. Lee, H.S. Park, J.H. Jang, Alkaline anion exchange membrane water electrolysis: Effects of electrolyte feed method and electrode binder content, *J. Power Sources*. 382 (2018) 22–29. <https://doi.org/10.1016/j.jpowsour.2018.02.025>.
- <sup>134</sup> R.I. Masel, Z. Liu, S.D. Sajjad, Anion Exchange Membrane Electrolyzers Showing 1 A/cm(2) at Less Than 2 V, *ECS Trans*. 75 (2016) 1143–1146. <https://doi.org/10.1149/07514.1143ecst>.
- <sup>135</sup> H.J. Park, S.Y. Lee, T.K. Lee, H.J. Kim, Y.M. Lee, N3-butyl imidazolium-based anion exchange membranes blended with Poly alcohol) for alkaline water, *J. Memb. Sci.* 611 (2020) 118355. <https://doi.org/10.1016/j.memsci.2020.118355>.
- <sup>136</sup> J.E. Park, M.J. Kim, M.S. Lim, S.Y. Kang, J.K. Kim, S.H. Oh, M. Her, Y.H. Cho, Y.E. Sung, Graphitic carbon nitride-carbon nanofiber as oxygen catalyst in anion-exchange membrane water electrolyzer and rechargeable metal-air cells, *Appl. Catal. B-Environmental*. 237 (2018) 140–148. <https://doi.org/10.1016/j.apcatb.2018.05.073>.
- <sup>137</sup> F. Razmjooei, A. Farooqui, R. Reissner, A.S. Gago, S.A. Ansar, K.A. Friedrich, Elucidating the Performance Limitations of Alkaline Electrolyte Membrane Electrolysis: Dominance of Anion Concentration in Membrane Electrode Assembly, *ChemElectroChem*. 7 (2020) 3951–3960. <https://doi.org/10.1002/celec.202000605>.
- <sup>138</sup> Y.S. Park, J. Lee, M.J. Jang, J. Yang, J. Jeong, J. Park, Y. Kim, M.H. Seo, Z. Chen, S.M. Choi, High-performance anion exchange membrane alkaline seawater electrolysis, *J. Mater. Chem. A*. 9 (2021) 9586–9592. <https://doi.org/10.1039/d0ta12336f>.
- <sup>139</sup> R.E. Coppola, F.N. Molinari, N.B. D’Accorso, G.C. Abuin, Polyvinyl alcohol nanofibers reinforced with polybenzimidazole: Facile preparation and properties of an anion exchange membrane, *Polym. Adv. Technol.* 32 (2021) 3505–3514. <https://doi.org/10.1002/pat.5361>.
- <sup>140</sup> J.D. Joe, D.B.S. Kumar, P. Sivakumar, Production Of Hydrogen By Anion Exchange Membrane Using AWE, *Int. J. Sci. Technol. Res.* 3 (2014) 38–42.

- <sup>141</sup> J. Liu, Z. Kang, D. Li, M. Pak, S.M. Alia, C. Fujimoto, G. Bender, Y.S. Kim, A.Z. Weber, Elucidating the Role of Hydroxide Electrolyte on Anion-Exchange-Membrane Water Electrolyzer Performance, *J. Electrochem. Soc.* 168 (2021) 054522. <https://doi.org/10.1149/1945-7111/ac0019>.
- <sup>142</sup> D. Xu, M.B. Stevens, M.R. Cosby, S.Z. Oener, A.M. Smith, L.J. Enman, K.E. Ayers, C.B. Capuano, J.N. Renner, N. Danilovic, Y. Li, H. Wang, Q. Zhang, S.W. Boettcher, Earth-Abundant Oxygen Electrocatalysts for Alkaline Anion-Exchange-Membrane Water Electrolysis: Effects of Catalyst Conductivity and Comparison with Performance in Three-Electrode Cells, *ACS Catal.* 9 (2019) 7–15. <https://doi.org/10.1021/acscatal.8b04001>.
- <sup>143</sup> T. Pandiarajan, L.J. Berchmans, S. Ravichandran, Fabrication of spinel ferrite based alkaline anion exchange membrane water electrolyzers for hydrogen production, *RSC Adv.* 5 (2015) 34100–34108. <https://doi.org/10.1039/c5ra01123j>.
- <sup>144</sup> L. Zeng, T.S. Zhao, R.H. Zhang, J.B. Xu, NiCo<sub>2</sub>O<sub>4</sub> nanowires@MnOx nanoflakes supported on stainless steel mesh with superior electrocatalytic performance for anion exchange membrane water splitting, *Electrochem. Commun.* 87 (2018) 66–70. <https://doi.org/10.1016/j.elecom.2018.01.002>.
- <sup>145</sup> P. Thangavel, M. Ha, S. Kumaraguru, A. Meena, A.N. Singh, A.M. Harzandi, K.S. Kim, Graphene-nanoplatelets-supported NiFe-MOF: High-efficiency and ultra-stable oxygen electrodes for sustained alkaline anion exchange membrane water electrolysis, *Energy Environ. Sci.* 13 (2020) 3447–3458. <https://doi.org/10.1039/d0ee00877j>.
- <sup>146</sup> J.E. Park, S.Y. Kang, S.H. Oh, J.K. Kim, M.S. Lim, C.Y. Ahn, Y.H. Cho, Y.E. Sung, High-performance anion-exchange membrane water electrolysis, *Electrochim. Acta.* 295 (2019) 99–106. <https://doi.org/10.1016/j.electacta.2018.10.143>.
- <sup>147</sup> F. Razmjooei, T. Morawietz, E. Taghizadeh, E. Hadjixenophontos, L. Mues, M. Gerle, B.D. Wood, C. Harms, A.S. Gago, S.A. Ansar, K.A. Friedrich, Increasing the performance of an anion-exchange membrane electrolyzer operating in pure water with a nickel-based microporous layer, *Joule* 5 (2021) 1776–1799. <https://doi.org/10.1016/j.joule.2021.05.006>.
- <sup>148</sup> Y. Leng, G. Chen, A.J. Mendoza, T.B. Tighe, M.A. Hickner, C.Y. Wang, Solid-state water electrolysis with an alkaline membrane, *J. Am. Chem. Soc.* 134 (2012) 9054–9057. <https://doi.org/10.1021/ja302439z>.
